# Supplementary material for: Synthesis of picolinates via a cooperative vinylogous anomeric-based oxidation using UiO-66(Zr)-N(CH2PO3H2)2 as a catalyst
Source: Royal Society of Chemistry journal article supplement (doi:10.1039/d3ra03438k), 2023-01-01
Supplement: d3ra03438k1.pdf [file d3ra03438k1.pdf]

**Synthesis of picolinate via a cooperative vinylogous anomeric-based oxidation using  
UiO-66(Zr)-N(CH<sub>2</sub>PO<sub>3</sub>H<sub>2</sub>)<sub>2</sub> as a catalyst**

Saeed Babae,<sup>a</sup> Hassan Sepehrmansourie,<sup>a</sup> Mahmoud Zarei,<sup>b\*</sup> Mohammad Ali Zolfigol<sup>a\*</sup>  
and Mojtaba Hosseinfard<sup>c</sup>

<sup>a</sup> Department of Organic Chemistry, Faculty of Chemistry, Bu-Ali Sina University, PO Box 6517838683, Hamedan, Iran. Tel: +988138282807, Fax: +988138380709 Iran. E-mail: zolfi@basu.ac.ir & mzolfigol@yahoo.com (M. A. Zolfigol).

<sup>b</sup> Department of Chemistry, Faculty of Science, University of Qom, Qom, 37185-359, Iran. E-mail: mahmoud8103@yahoo.com (M. Zarei).

<sup>c</sup> Department of Energy, Materials and Energy Research Center, P.O. Box 31787-316, Karaj, Iran.

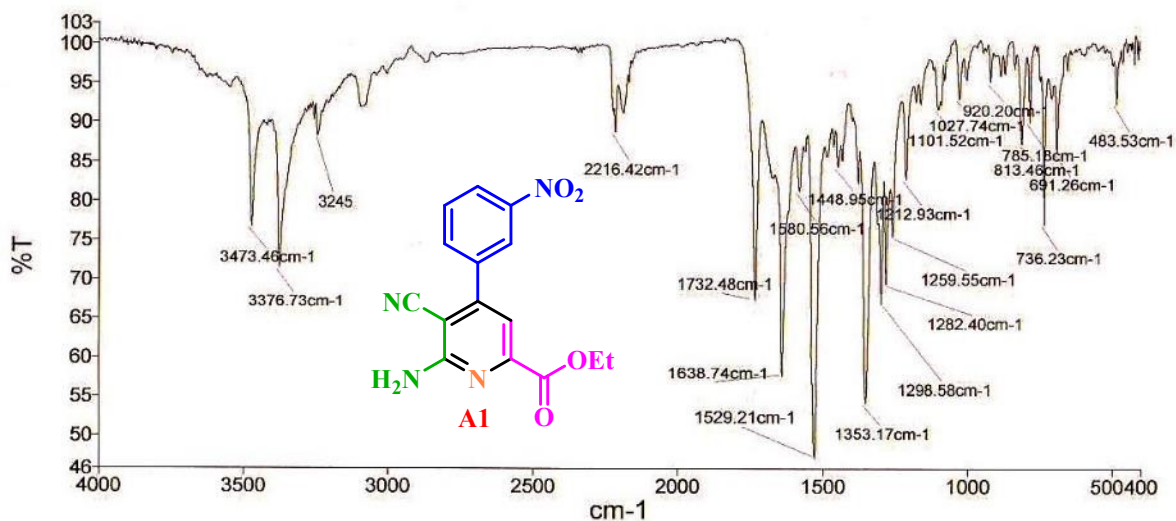

FT-IR spectrum of ethyl 6-amino-5-cyano-4-(3-nitrophenyl)picolinate (A1).

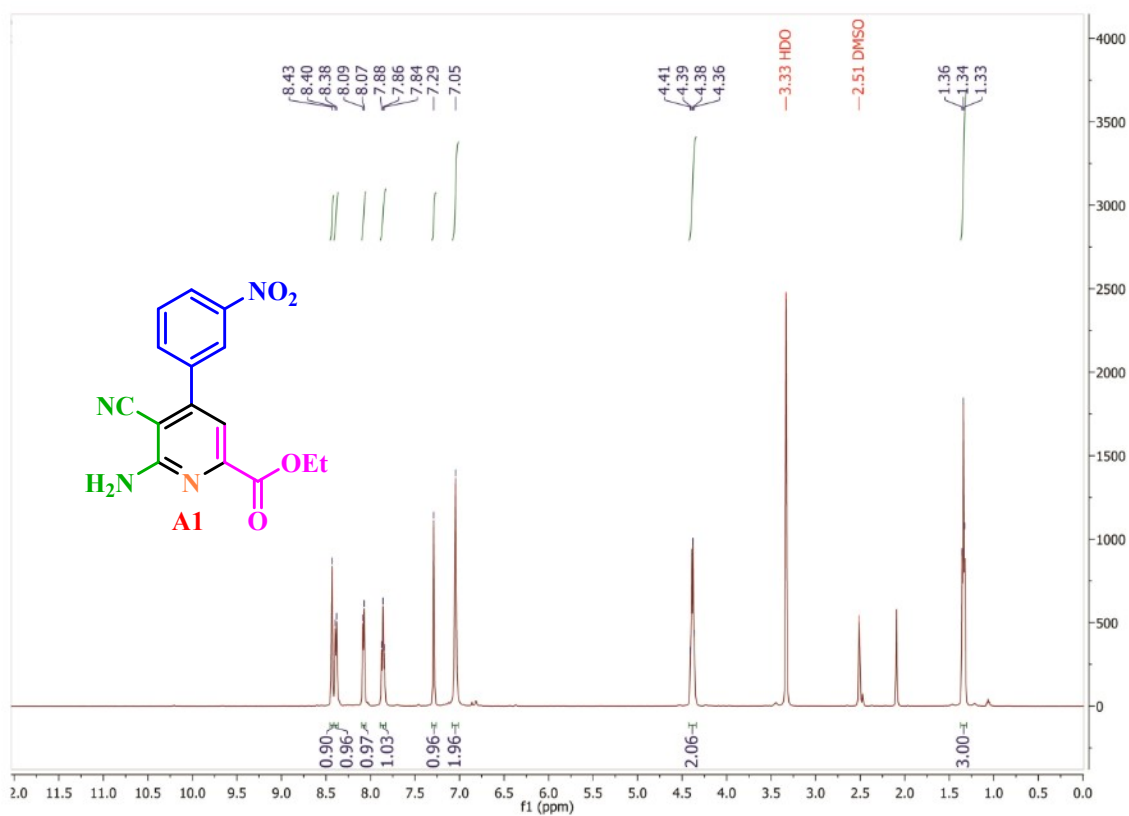

<sup>1</sup>H NMR spectrum of ethyl 6-amino-5-cyano-4-(3-nitrophenyl)picolinate (A1).

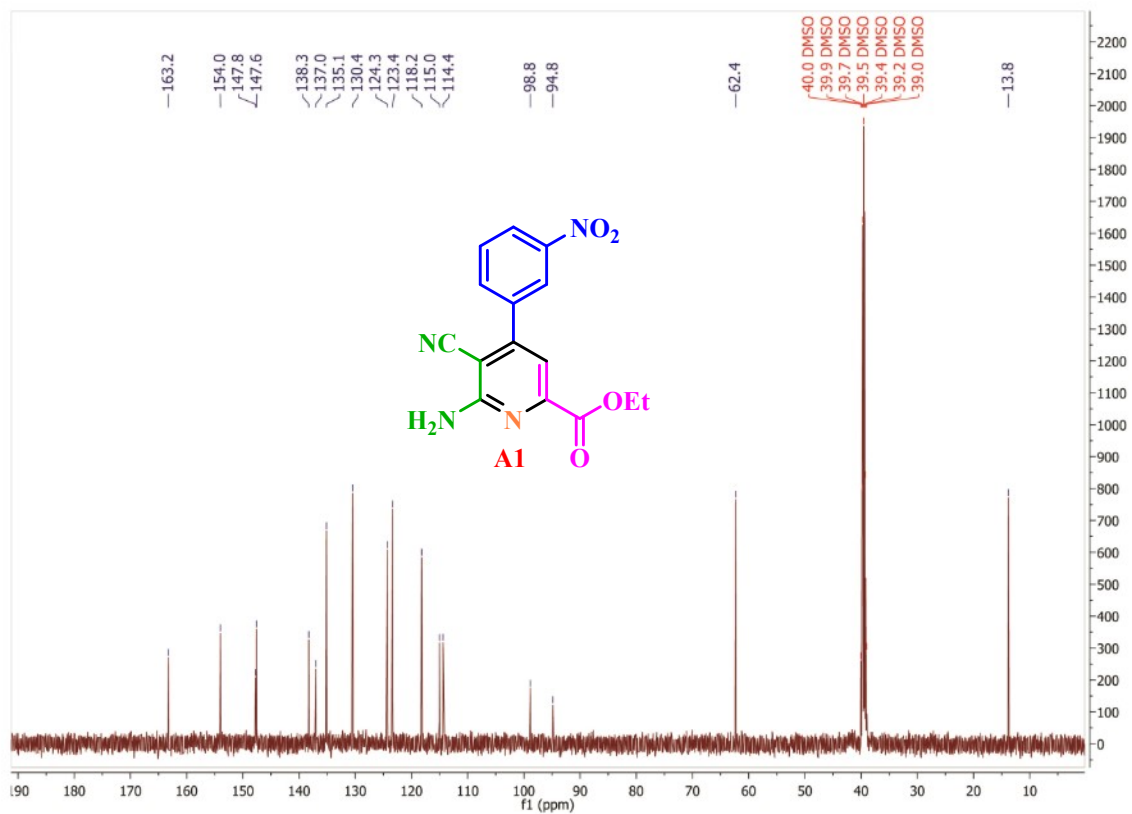

**<sup>13</sup>C NMR spectrum of ethyl 6-amino-5-cyano-4-(3-nitrophenyl)picolinate (A1).**

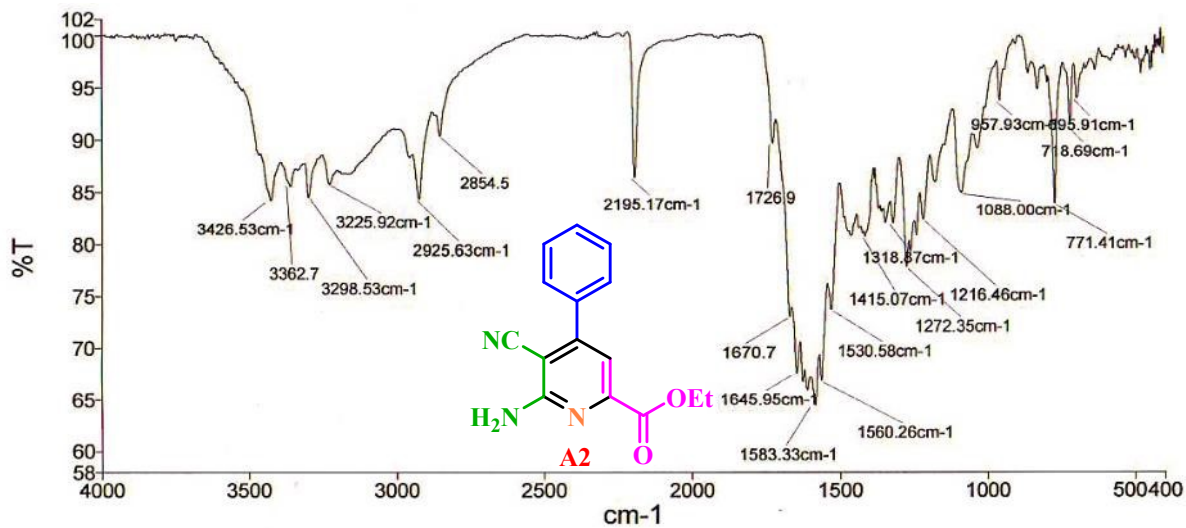

**FT-IR spectrum of ethyl 6-amino-5-cyano-4-phenylpicolinate (A2).**

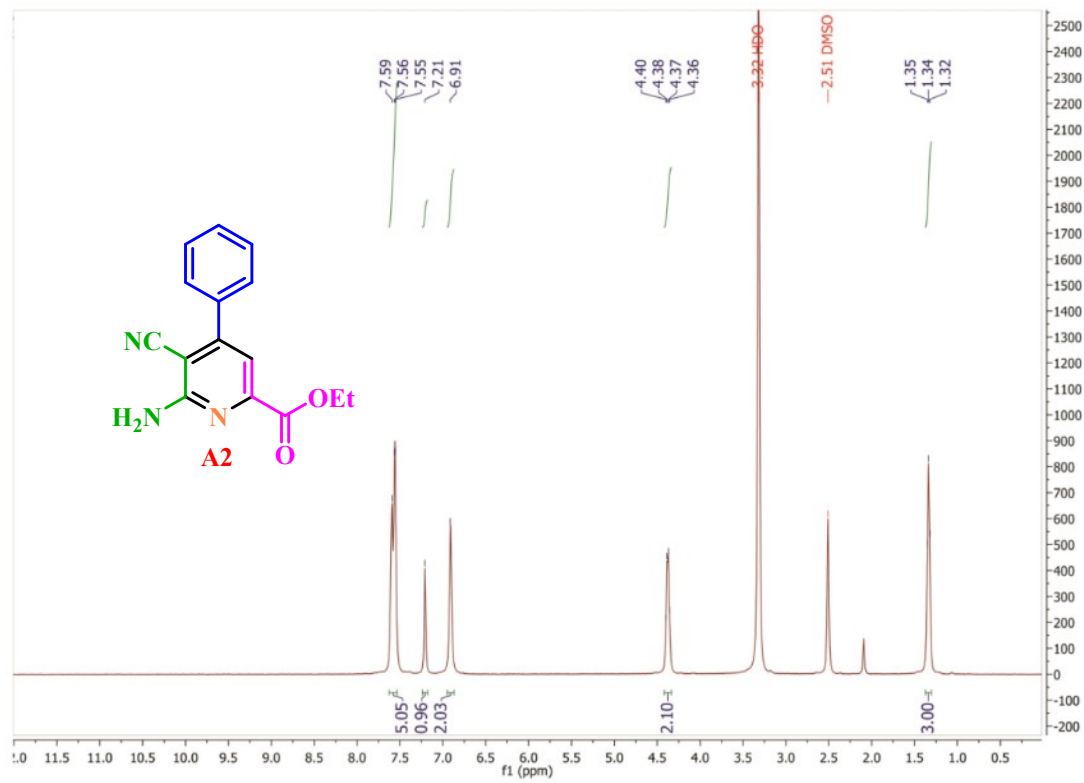

**<sup>1</sup>H NMR spectrum of ethyl 6-amino-5-cyano-4-phenylpicolinate (A2).**

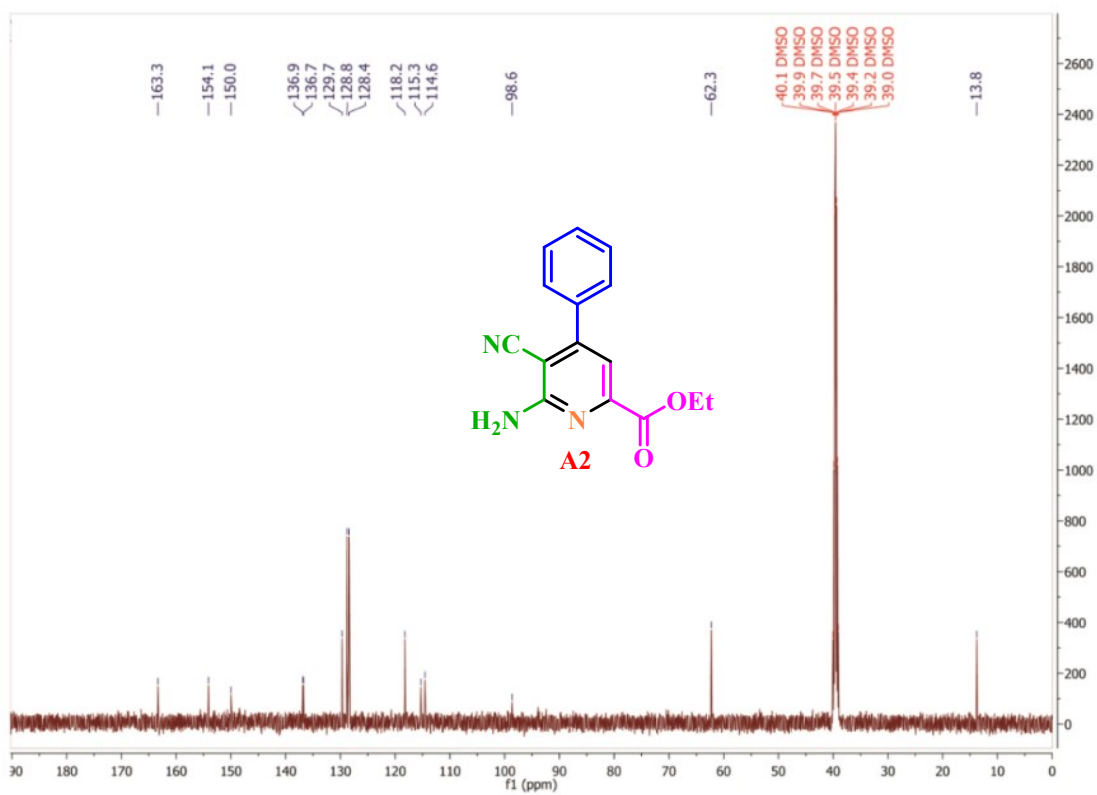

**<sup>13</sup>C NMR spectrum of ethyl 6-amino-5-cyano-4-phenylpicolinate (A2).**

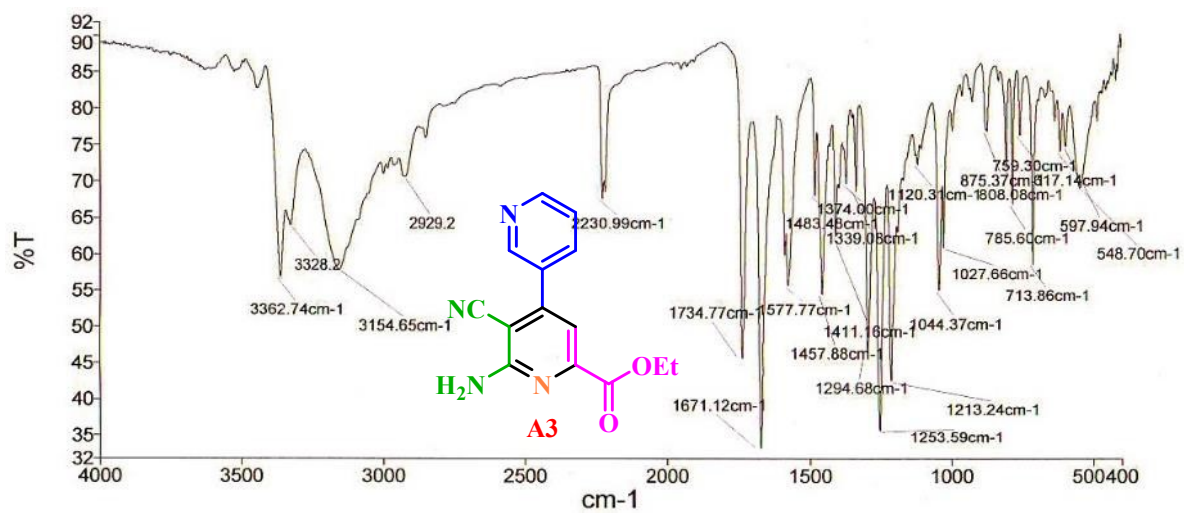

FT-IR spectrum of 6'-amino-5'-cyano-[3,4'-bipyridine]-2'-carboxylate (A3).

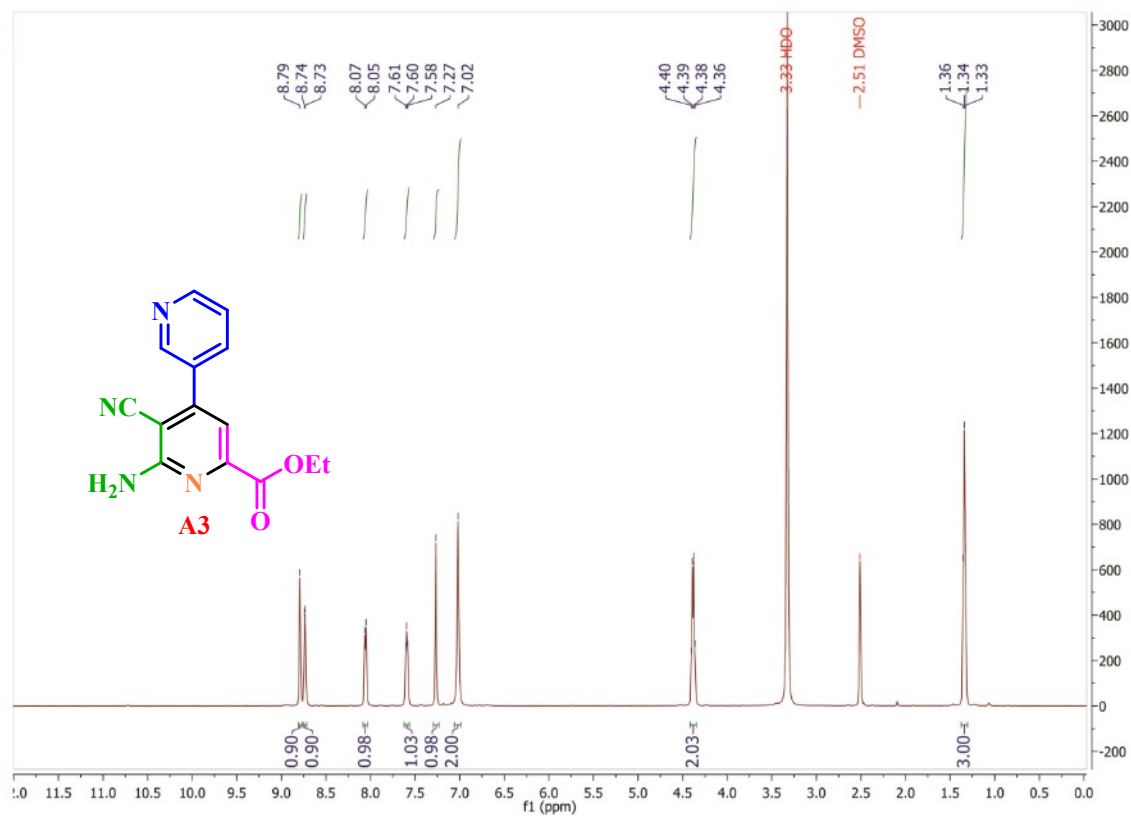

<sup>1</sup>H NMR spectrum of ethyl 6'-amino-5'-cyano-[3,4'-bipyridine]-2'-carboxylate (A3).

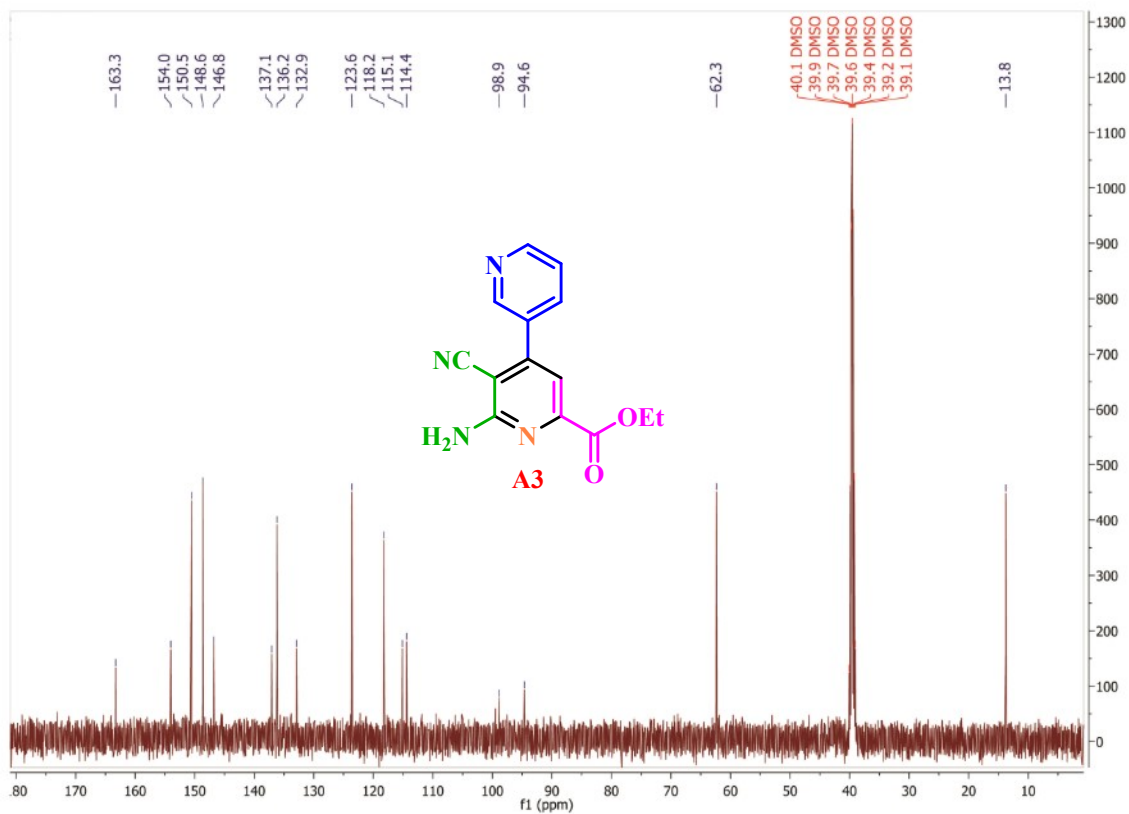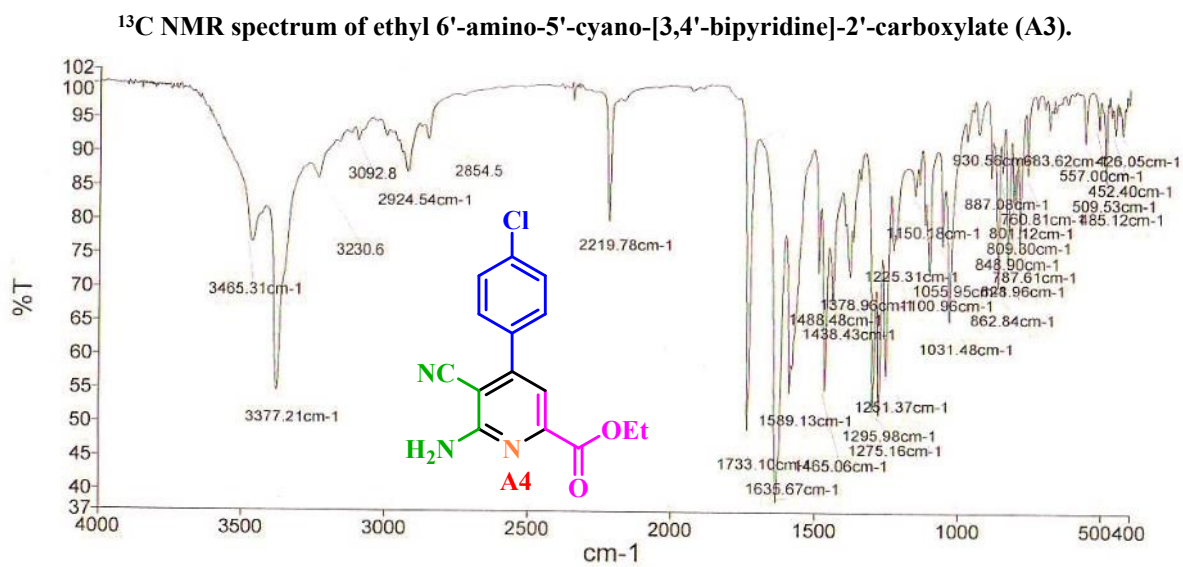

**FT-IR spectrum of ethyl 6-amino-4-(4-chlorophenyl)-5-cyanopicolinate (A4).**

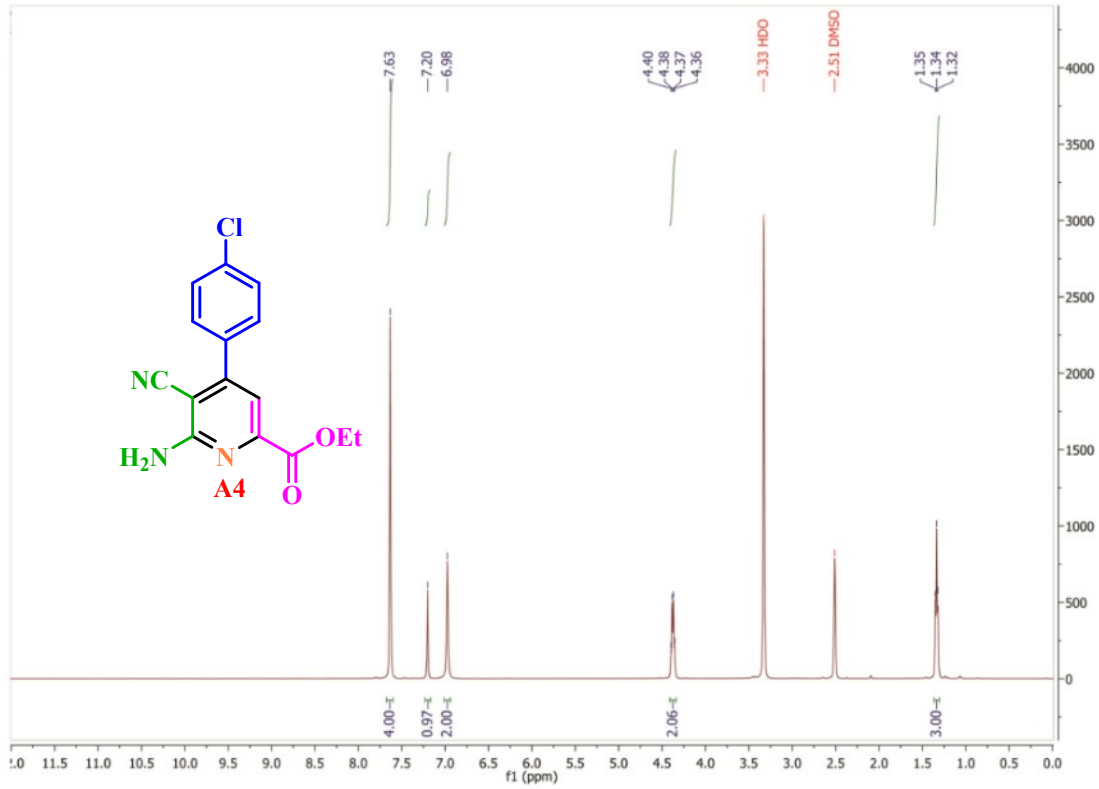

**<sup>1</sup>H NMR spectrum of ethyl 6-amino-4-(4-chlorophenyl)-5-cyanopicolinate (A4).**

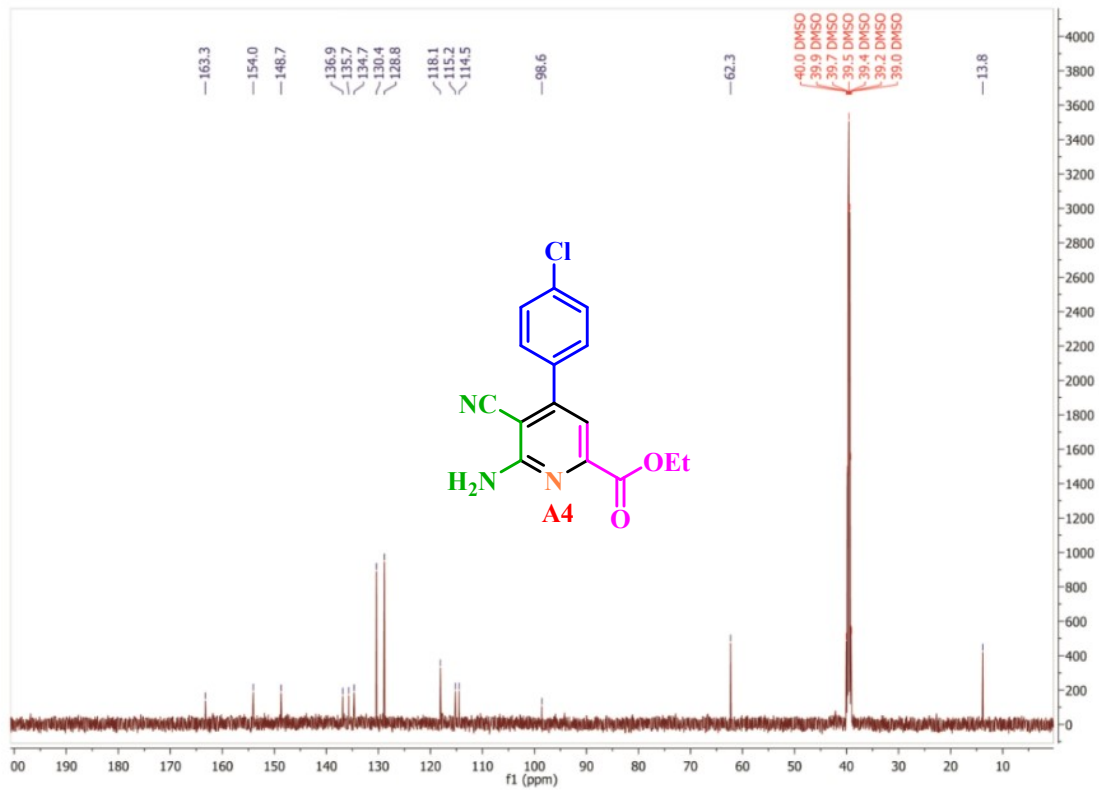

**<sup>13</sup>C NMR spectrum of ethyl 6-amino-4-(4-chlorophenyl)-5-cyanopicolinate (A4).**

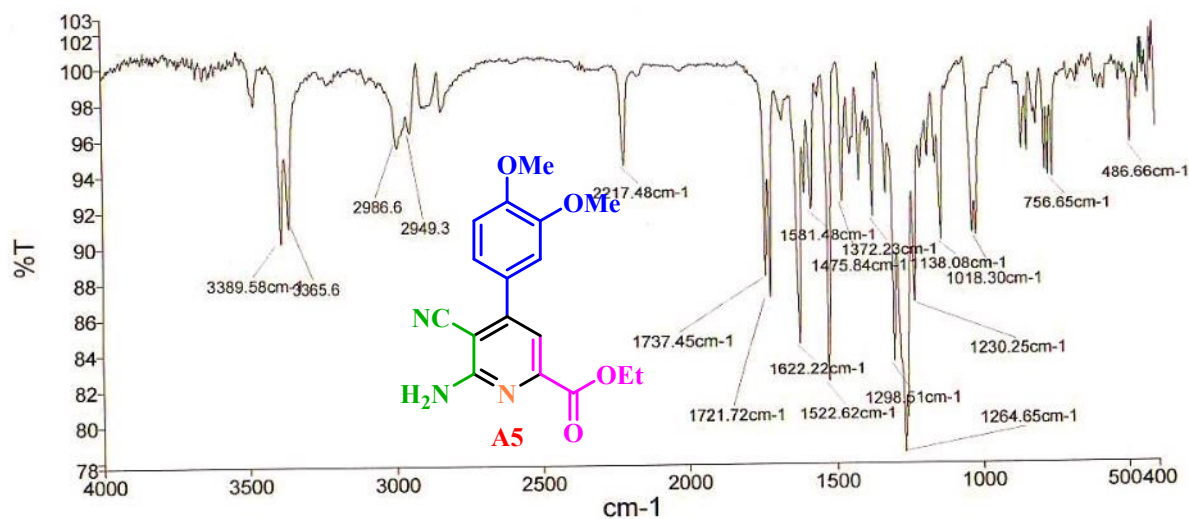

FT-IR spectrum of ethyl 6-amino-5-cyano-4-(3,4-dimethoxyphenyl) picolinate (A5).

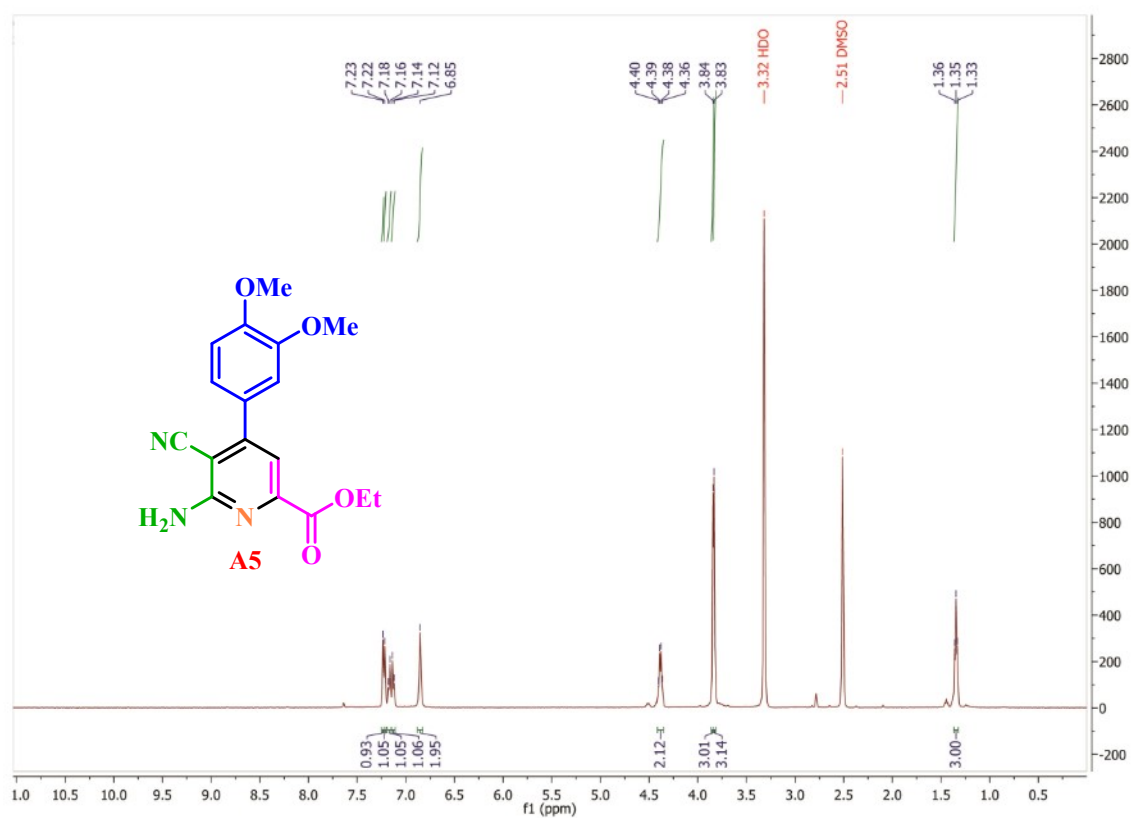

<sup>1</sup>H NMR spectrum of ethyl 6-amino-5-cyano-4-(3,4-dimethoxyphenyl) picolinate (A5).



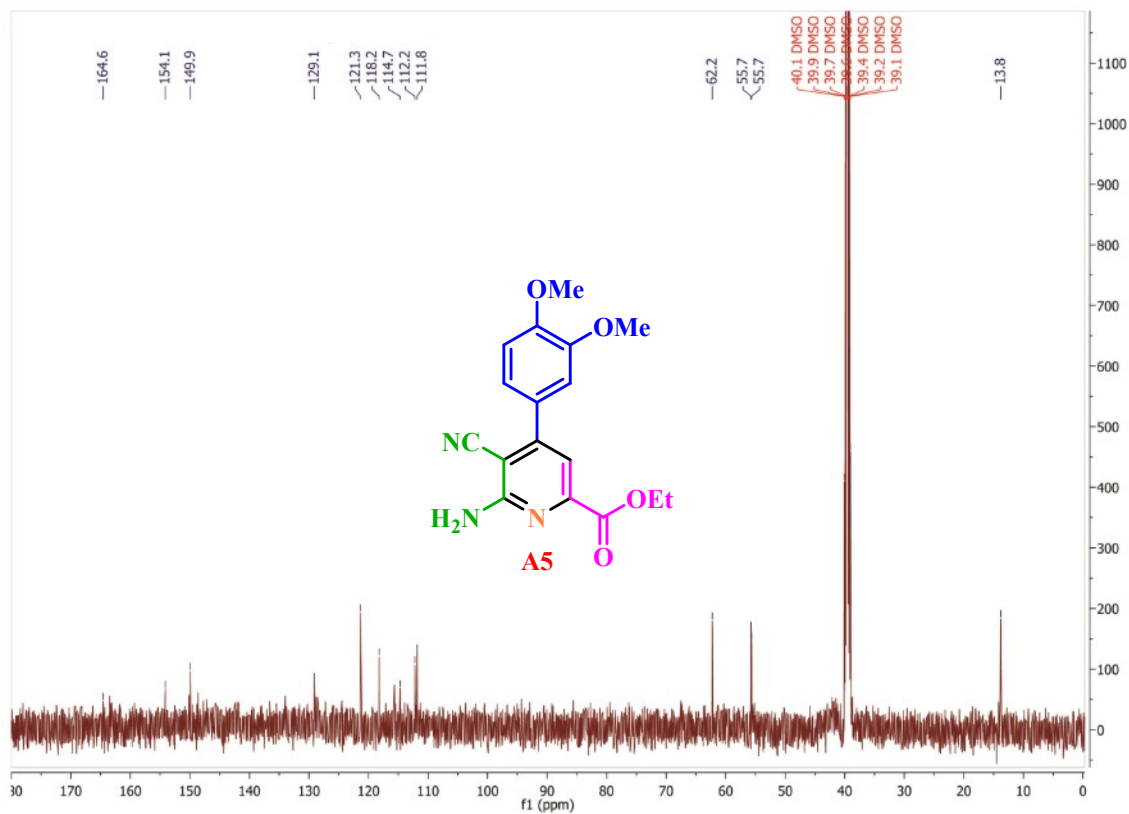

<sup>13</sup>C NMR spectrum of ethyl 6-amino-5-cyano-4-(3,4-dimethoxyphenyl)picolinate (A5).

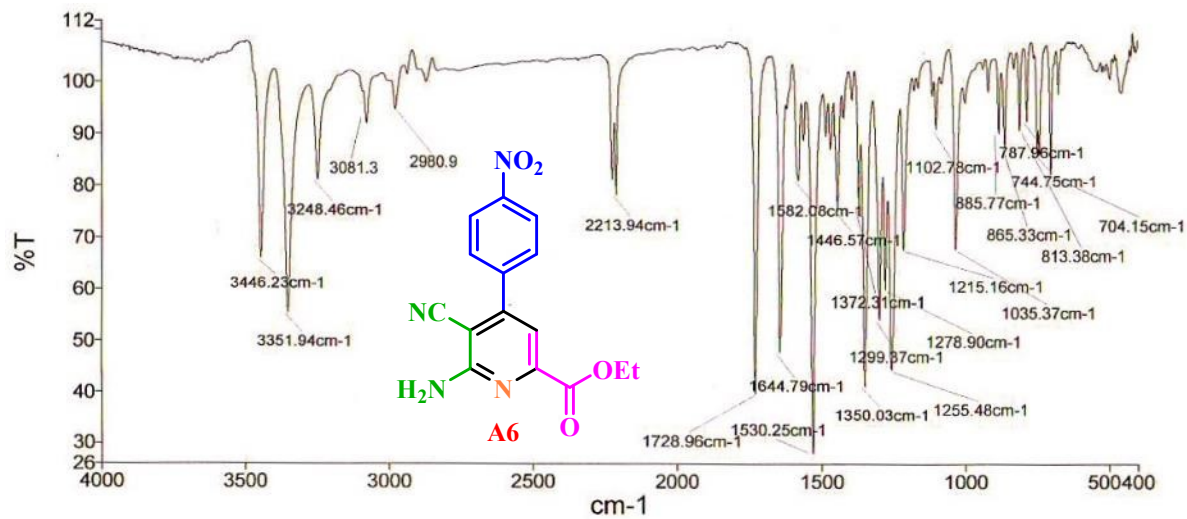

FT-IR spectrum of ethyl 6-amino-5-cyano-4-(4-nitrophenyl)picolinate (A6).

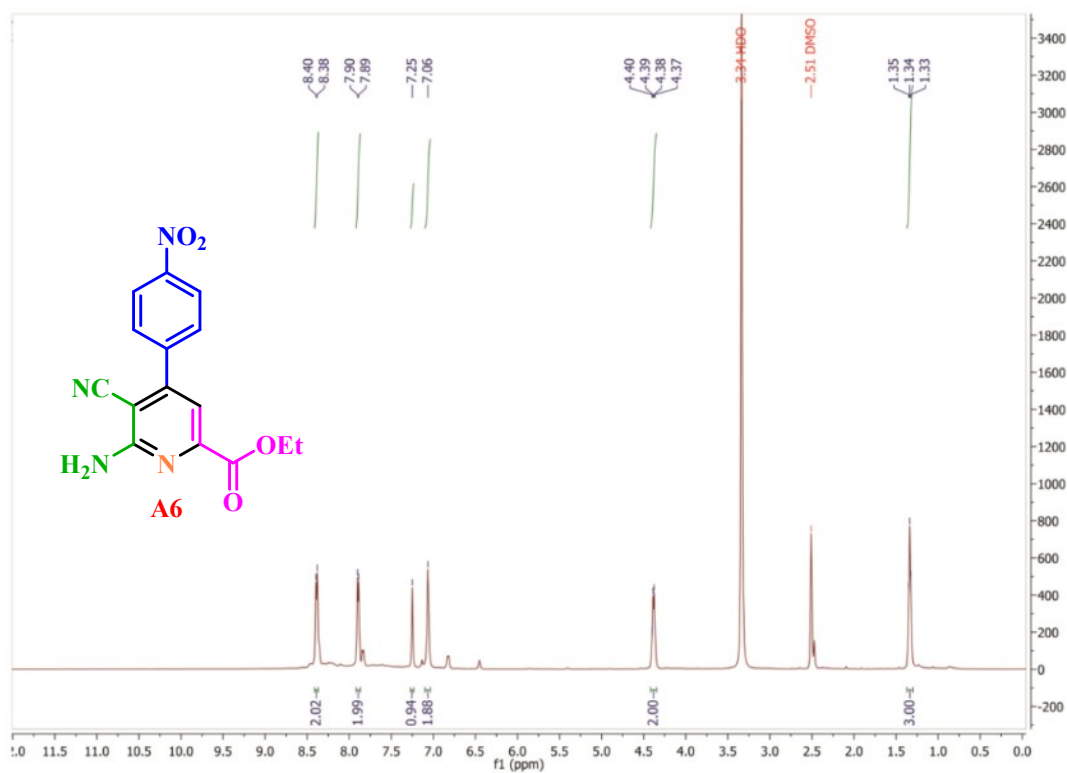

**<sup>1</sup>H NMR spectrum of ethyl 6-amino-5-cyano-4-(4-nitrophenyl)picolinate (A6).**

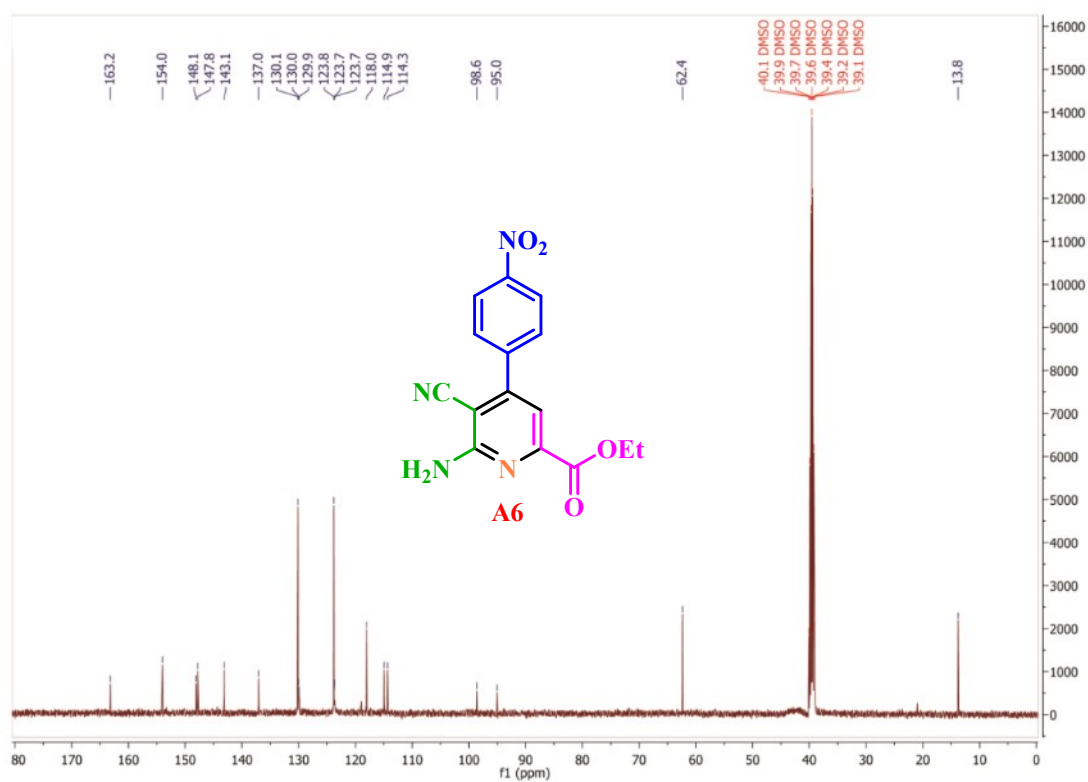

**<sup>13</sup>C NMR spectrum of ethyl 6-amino-5-cyano-4-(4-nitrophenyl)picolinate (A6).**

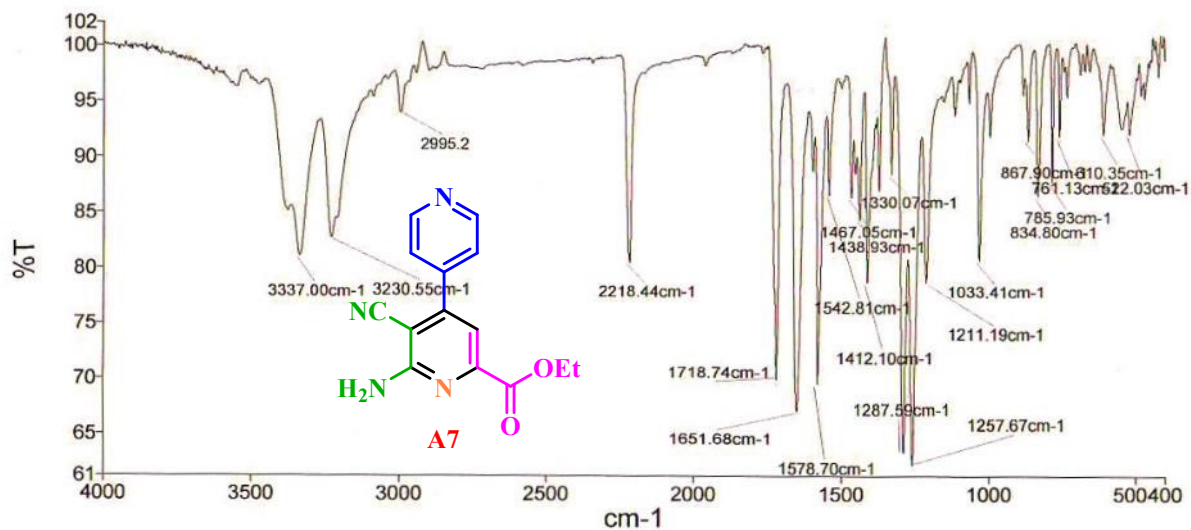

FT-IR spectrum of 6-amino-5-cyano-[4,4'-bipyridine]-2-carboxylate (A7).

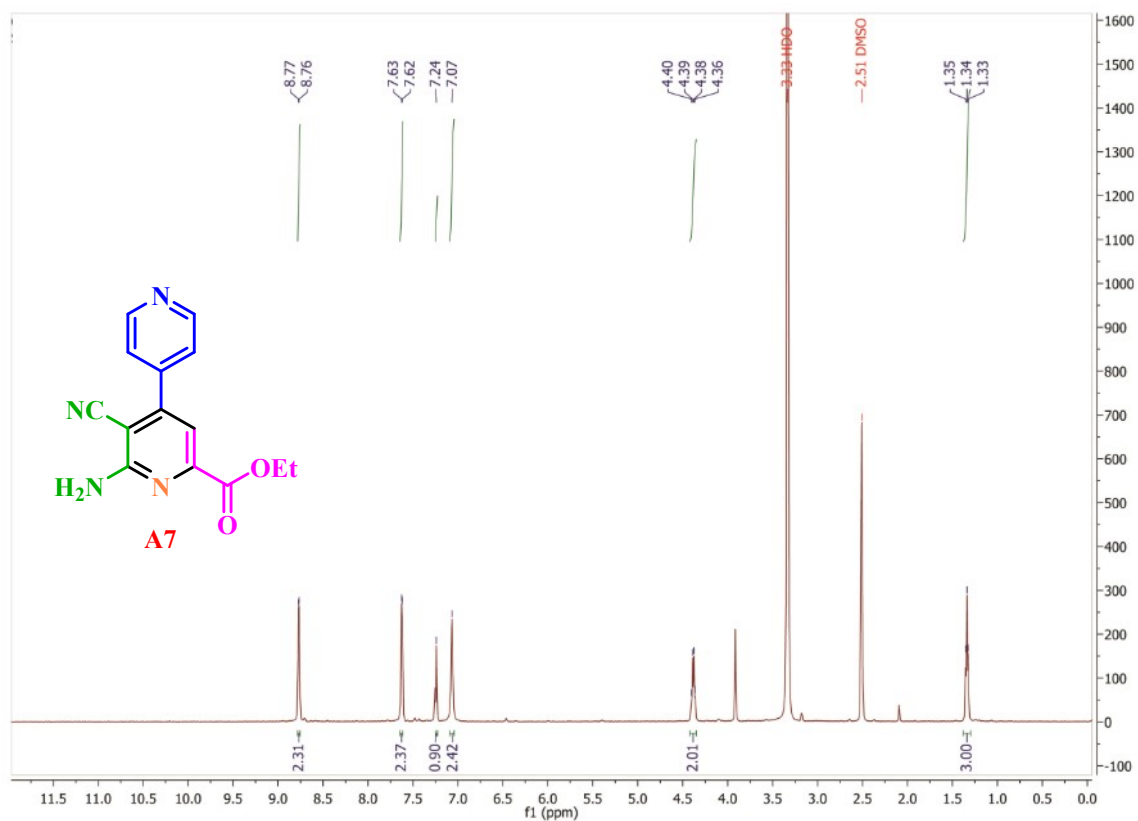

<sup>1</sup>H NMR spectrum of ethyl 6-amino-5-cyano-[4,4'-bipyridine]-2-carboxylate (A7).

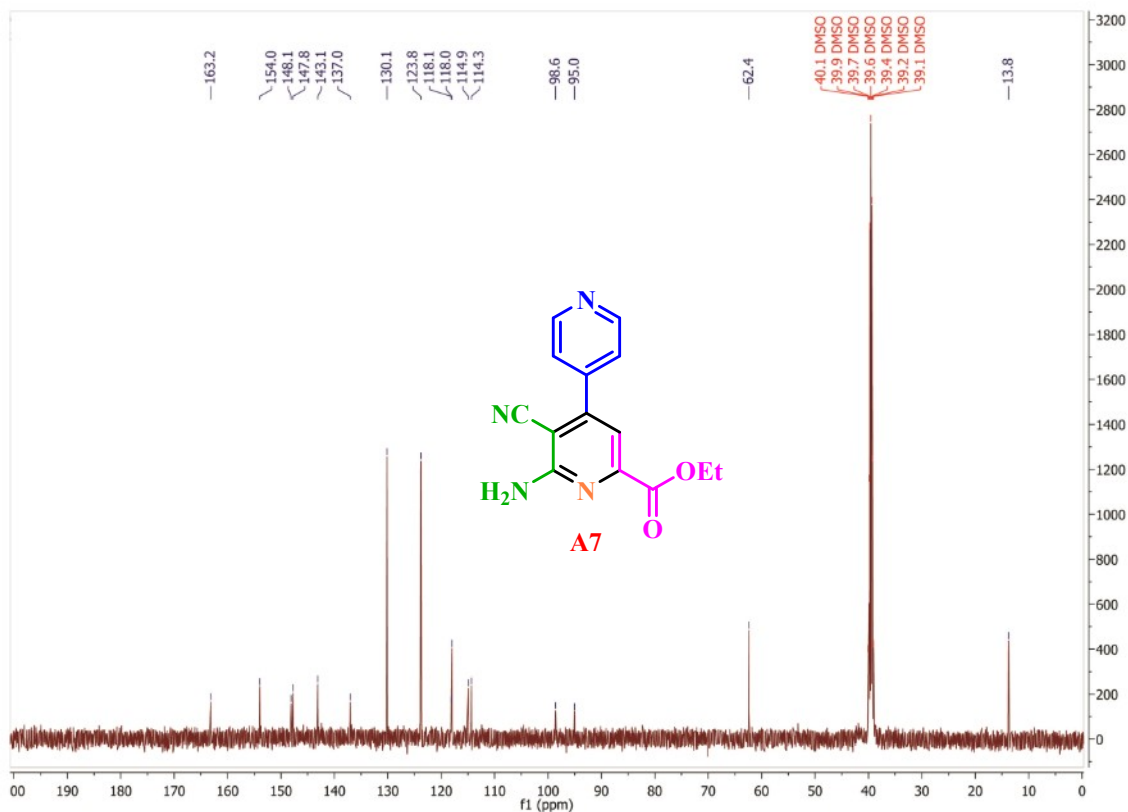

**<sup>13</sup>C NMR spectrum of ethyl 6-amino-5-cyano-[4,4'-bipyridine]-2-carboxylate (A7).**

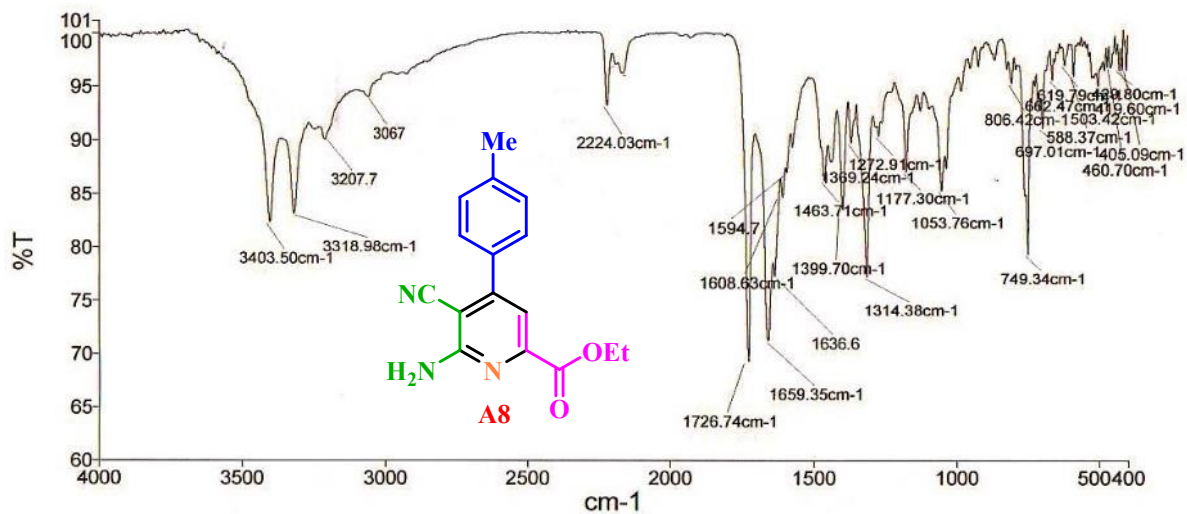

**FT-IR spectrum of ethyl 6-amino-5-cyano-4-(p-tolyl)picolinate (A8).**

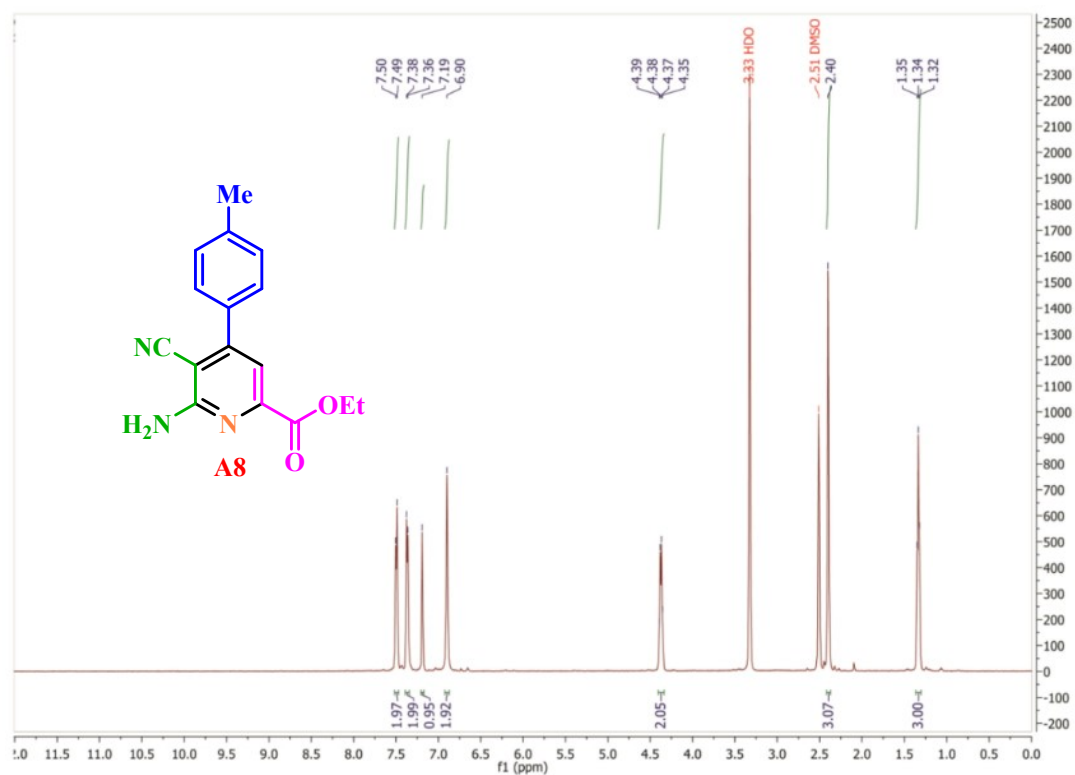

**<sup>1</sup>H NMR spectrum of ethyl 6-amino-5-cyano-4-(p-tolyl)picolinate (A8).**

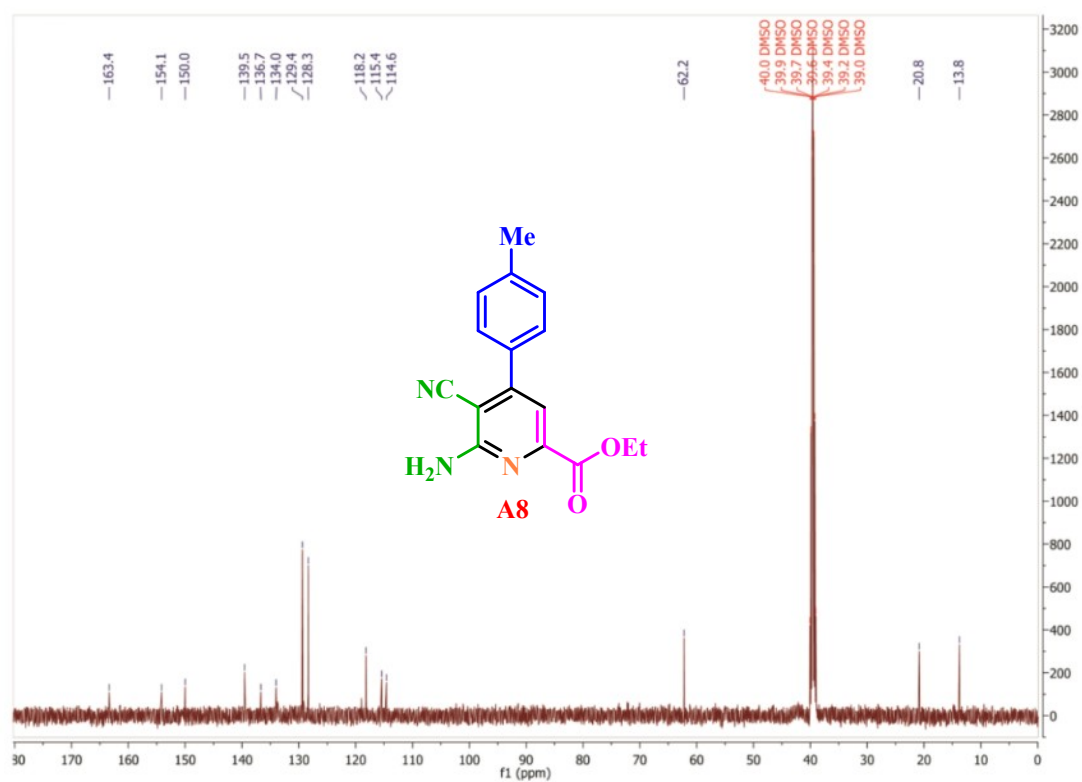

**<sup>13</sup>C NMR spectrum of ethyl 6-amino-5-cyano-4-(p-tolyl)picolinate (A8).**

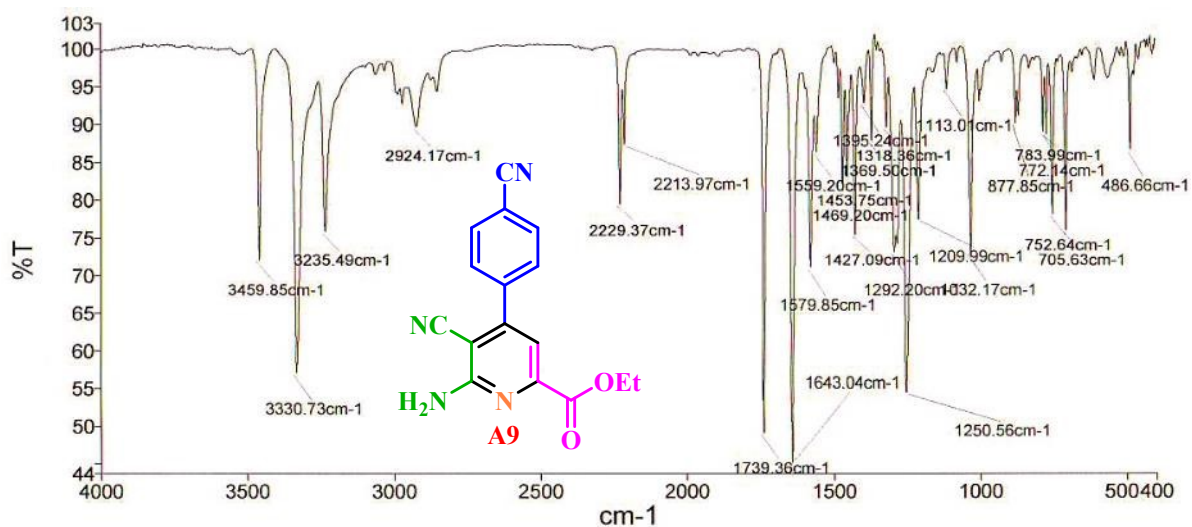

FT-IR spectrum of ethyl 6-amino-5-cyano-4-(4-cyanophenyl)picolinate (A9).

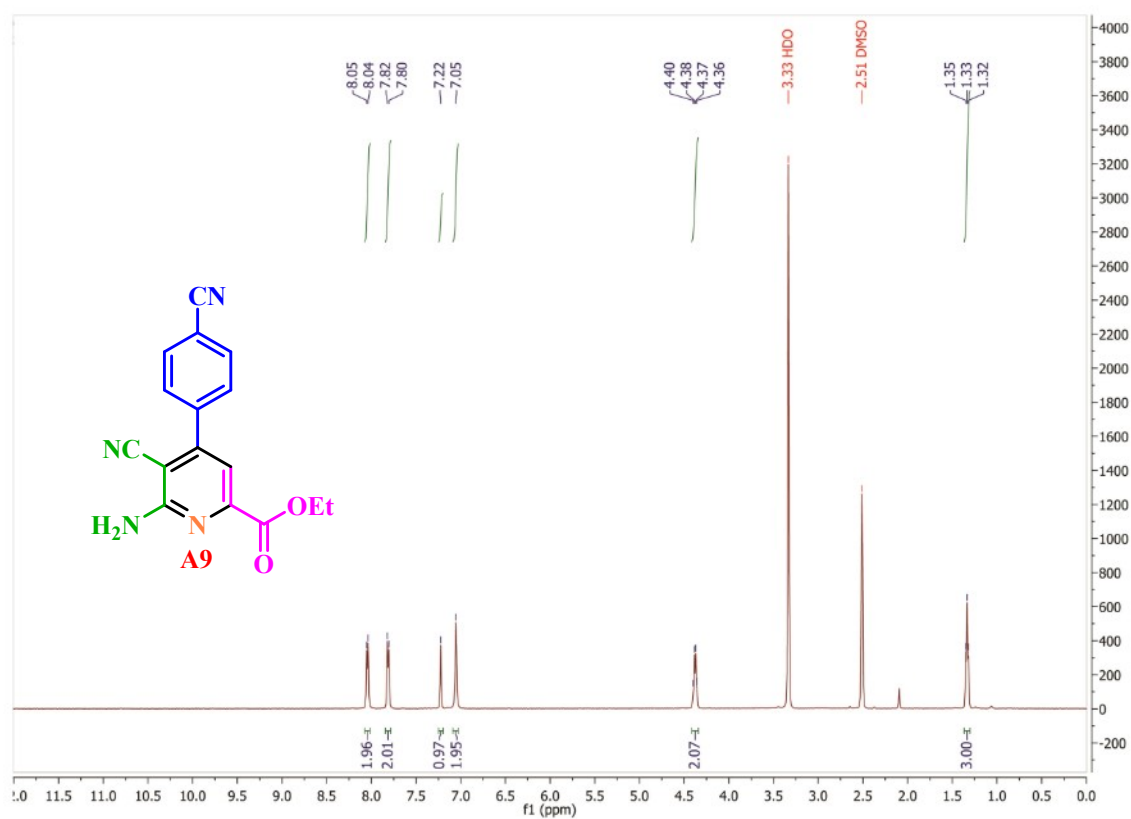

<sup>1</sup>H NMR spectrum of ethyl 6-amino-5-cyano-4-(4-cyanophenyl)picolinate (A9).

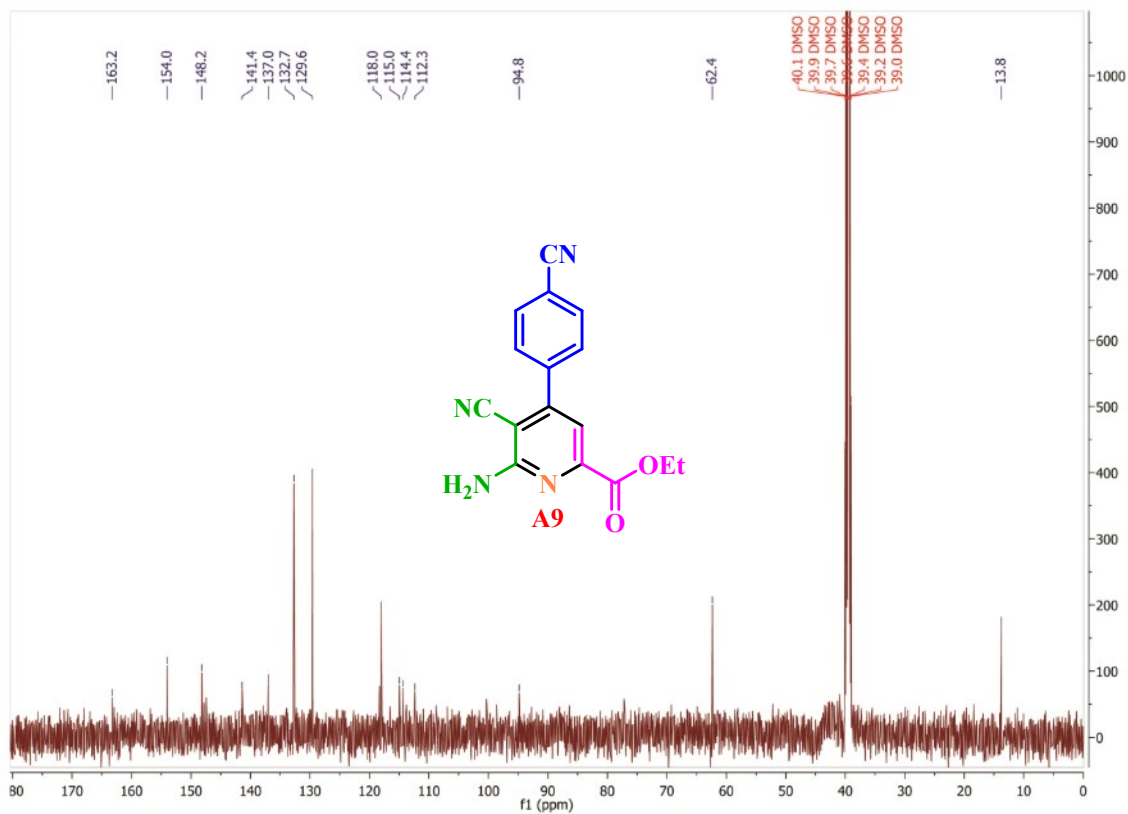

**<sup>13</sup>C NMR spectrum of ethyl 6-amino-5-cyano-4-(4-cyanophenyl)picolinate (A9).**

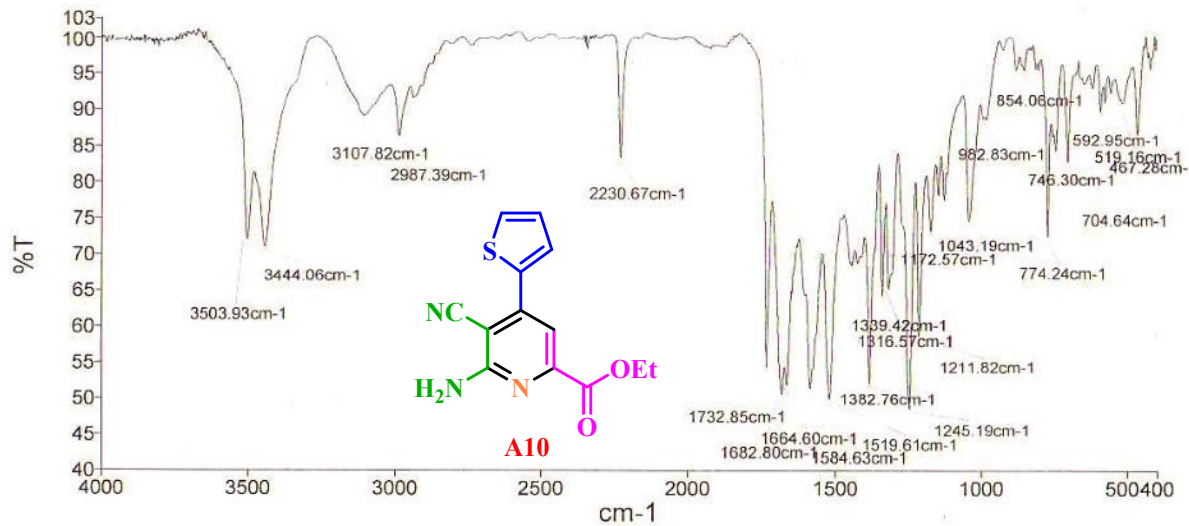

**FT-IR spectrum of ethyl 6-amino-5-cyano-4-(thiophen-2-yl)picolinate (A10).**

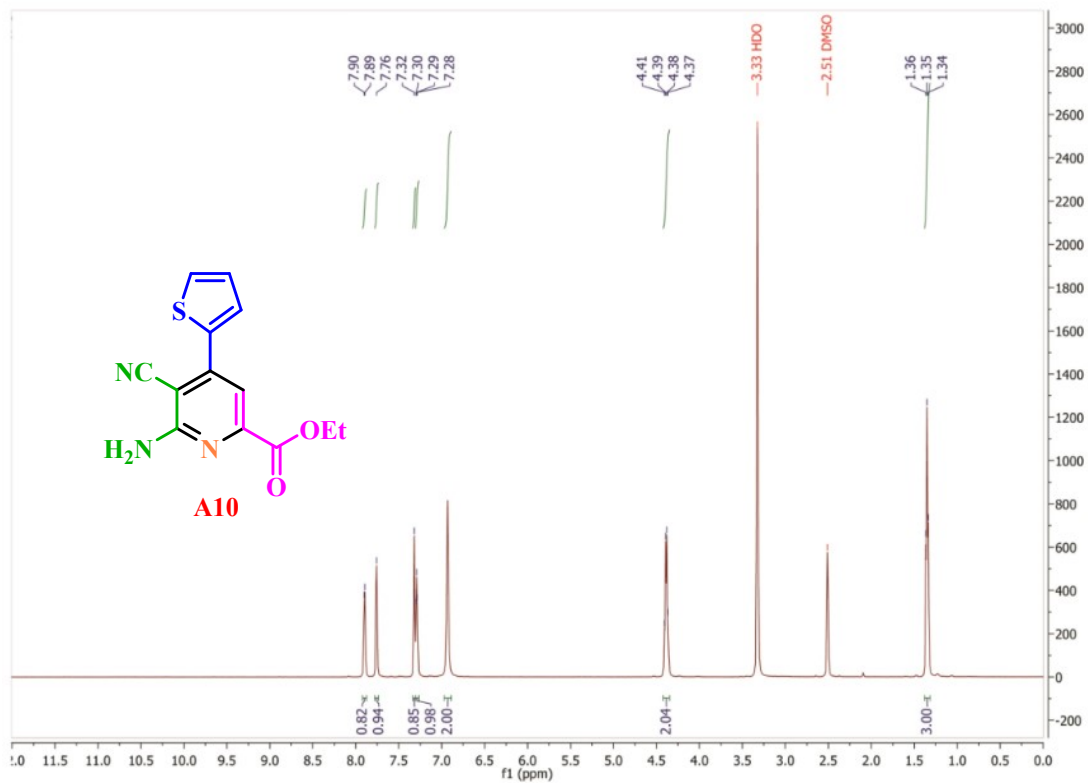

**<sup>1</sup>H NMR spectrum of ethyl 6-amino-5-cyano-4-(thiophen-2-yl)picolinate (A10).**

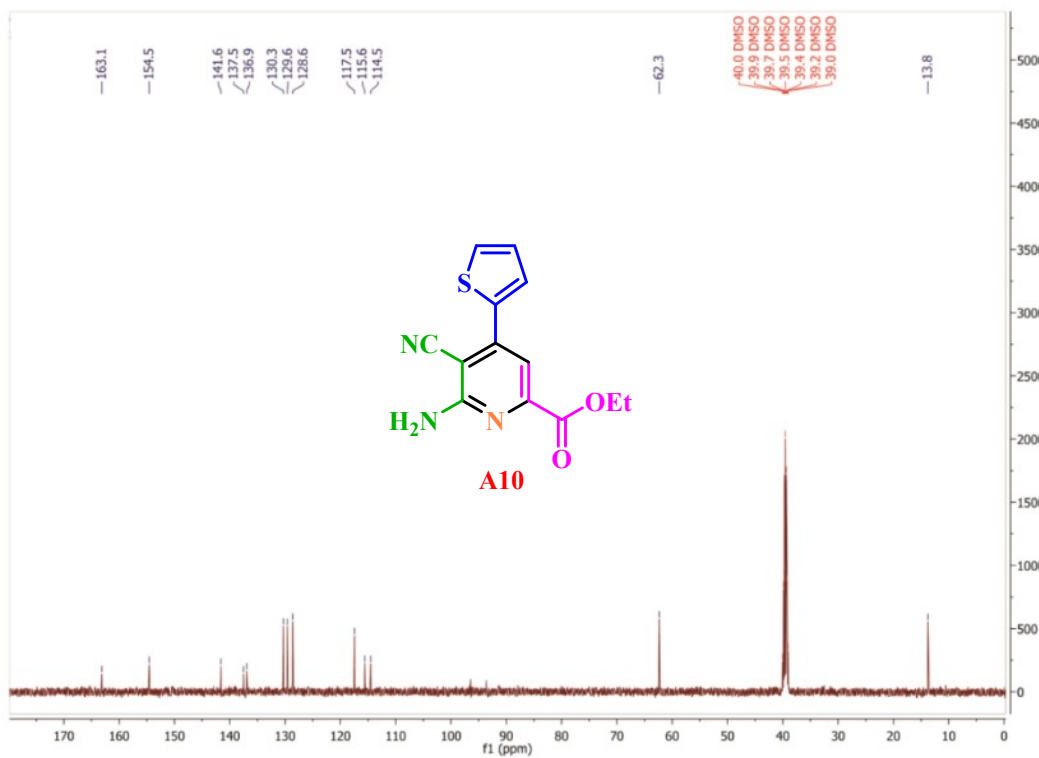

**<sup>13</sup>C NMR spectrum of ethyl 6-amino-5-cyano-4-(thiophen-2-yl)picolinate (A10).**



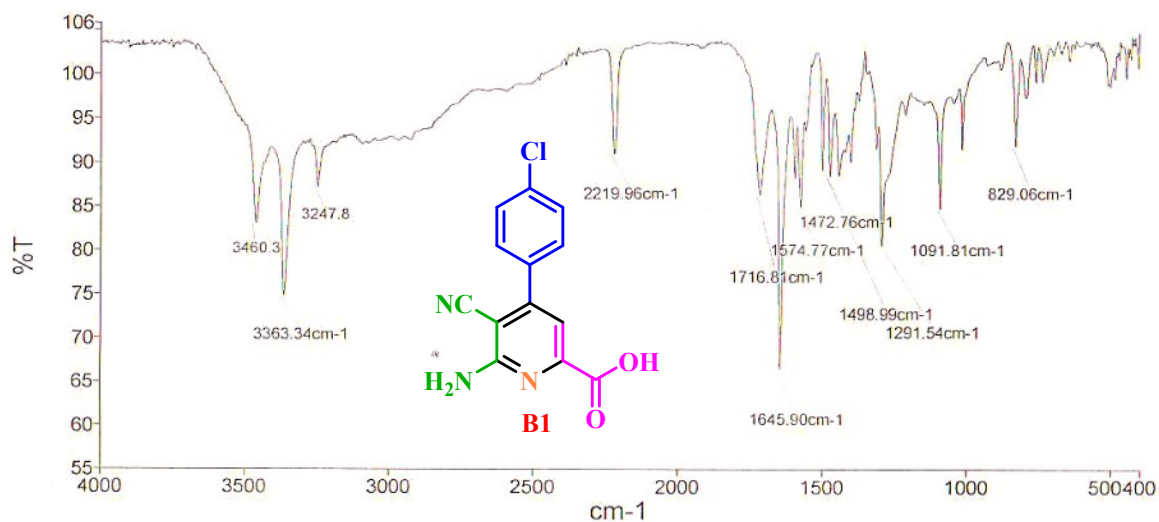

FT-IR spectrum of 6-amino-4-(4-chlorophenyl)-5-cyanopicolinic acid (B1).

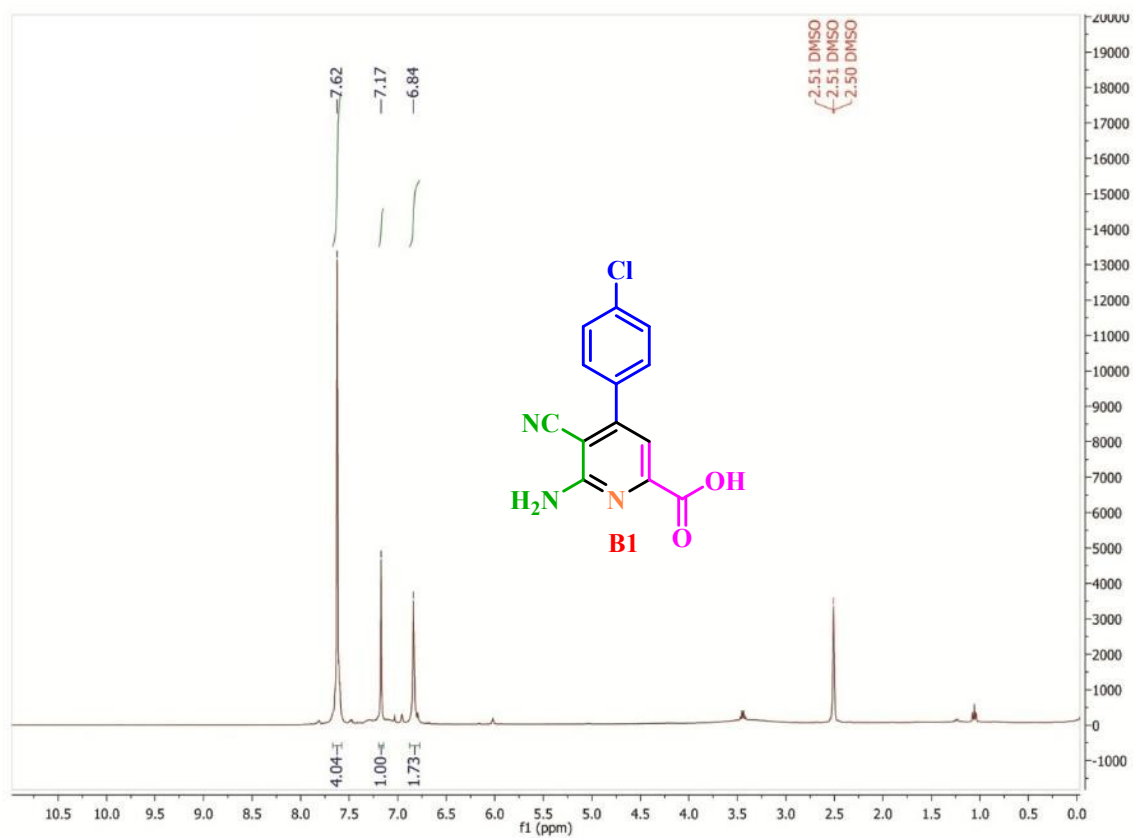

<sup>1</sup>H NMR spectrum of 6-amino-4-(4-chlorophenyl)-5-cyanopicolinic acid (B1).

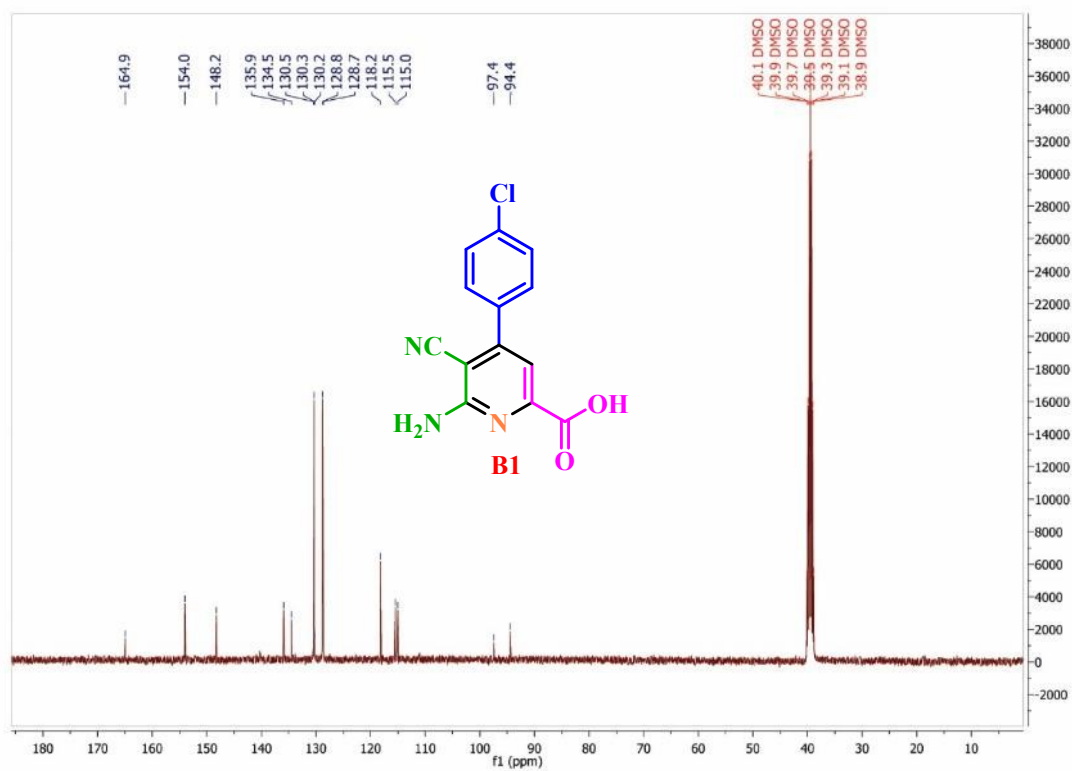

<sup>13</sup>C NMR spectrum of 6-amino-4-(4-chlorophenyl)-5-cyanopicolinic acid (B1).

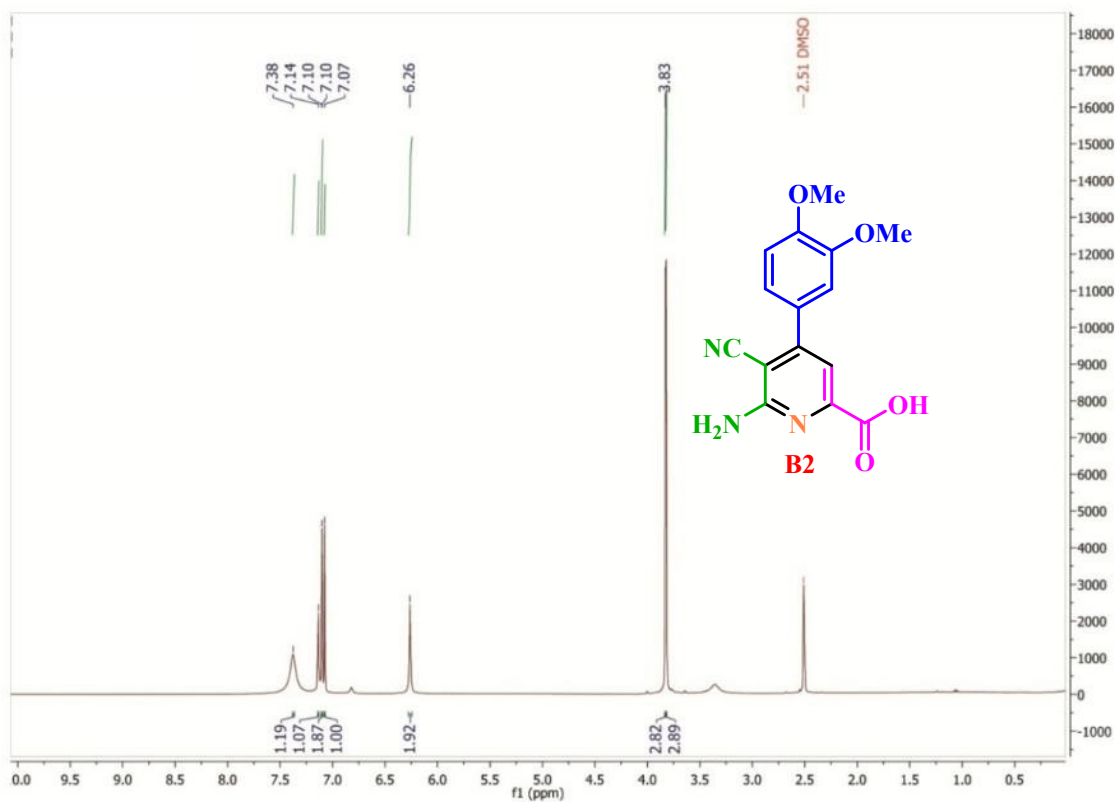

<sup>1</sup>H NMR spectrum of 6-amino-5-cyano-4-(3,4-dimethoxyphenyl)picolinic acid (B2).

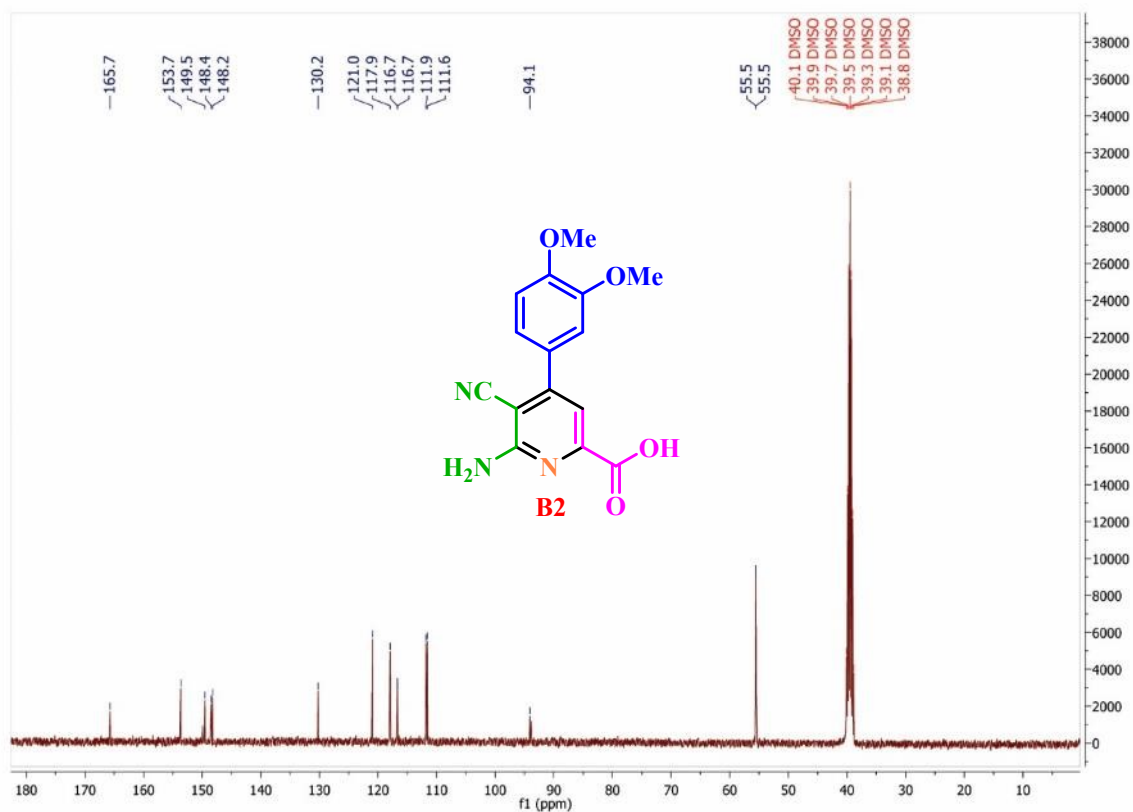

**<sup>13</sup>C NMR spectrum of 6-amino-5-cyano-4-(3,4-dimethoxyphenyl)picolinic acid (B2).**

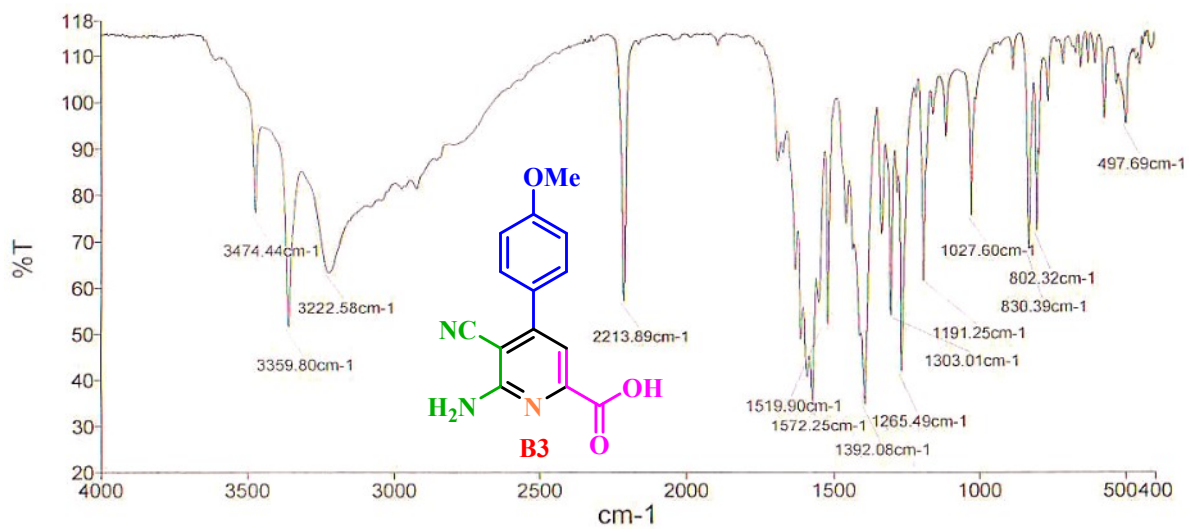

**FT-IR spectrum of 6-amino-5-cyano-4-(4-methoxyphenyl)picolinic acid (B3).**

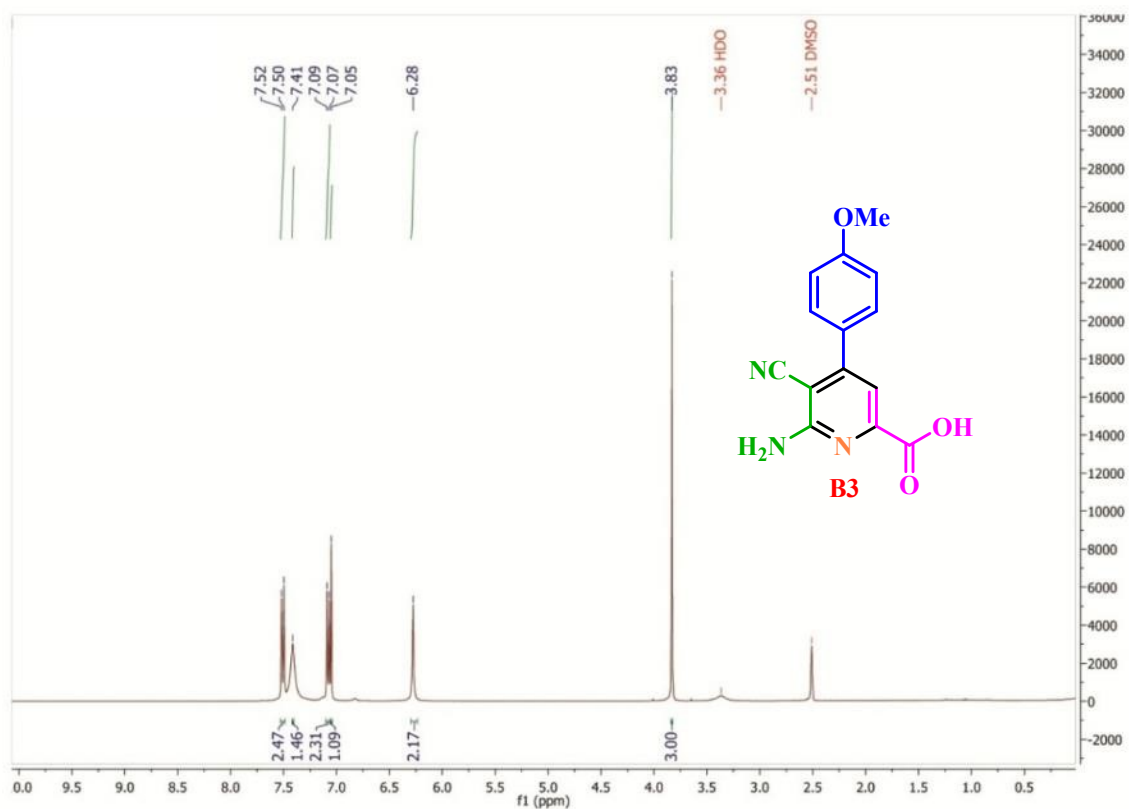

**<sup>1</sup>H NMR spectrum of 6-amino-5-cyano-4-(4-methoxyphenyl)picolinic acid (B3).**

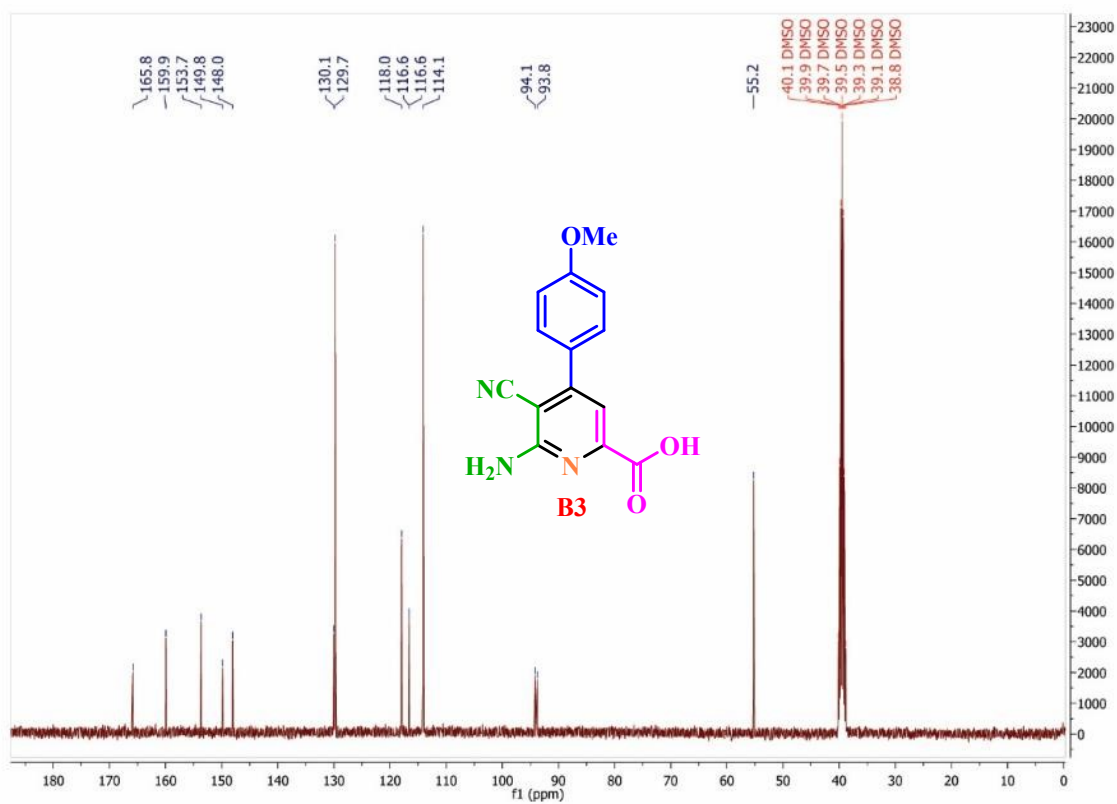

**<sup>13</sup>C NMR spectrum of 6-amino-5-cyano-4-(4-methoxyphenyl)picolinic acid (B3).**

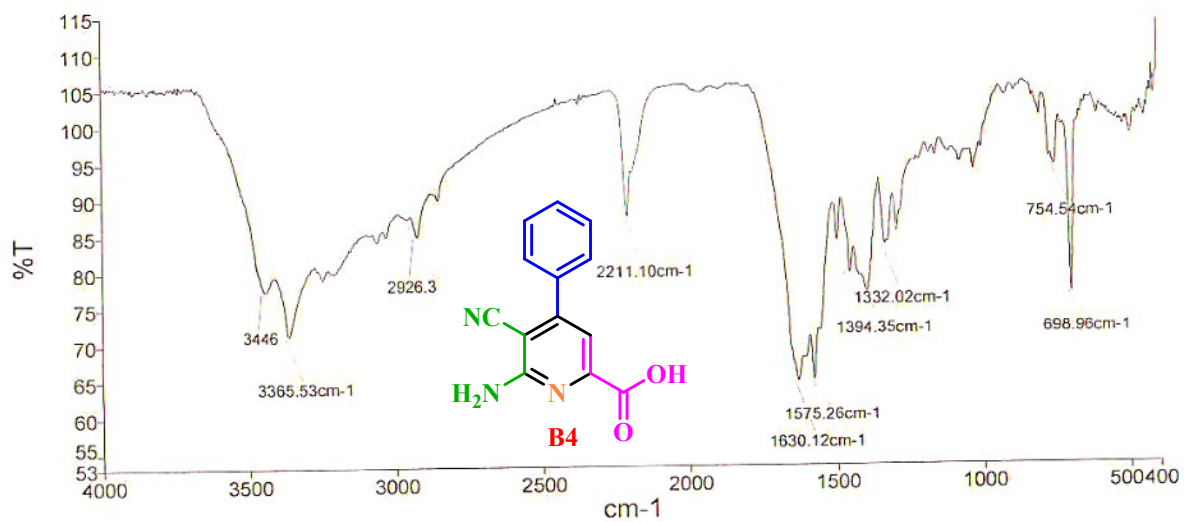

FT-IR spectrum of 6-amino-5-cyano-4-phenylpicolinic acid (B4).

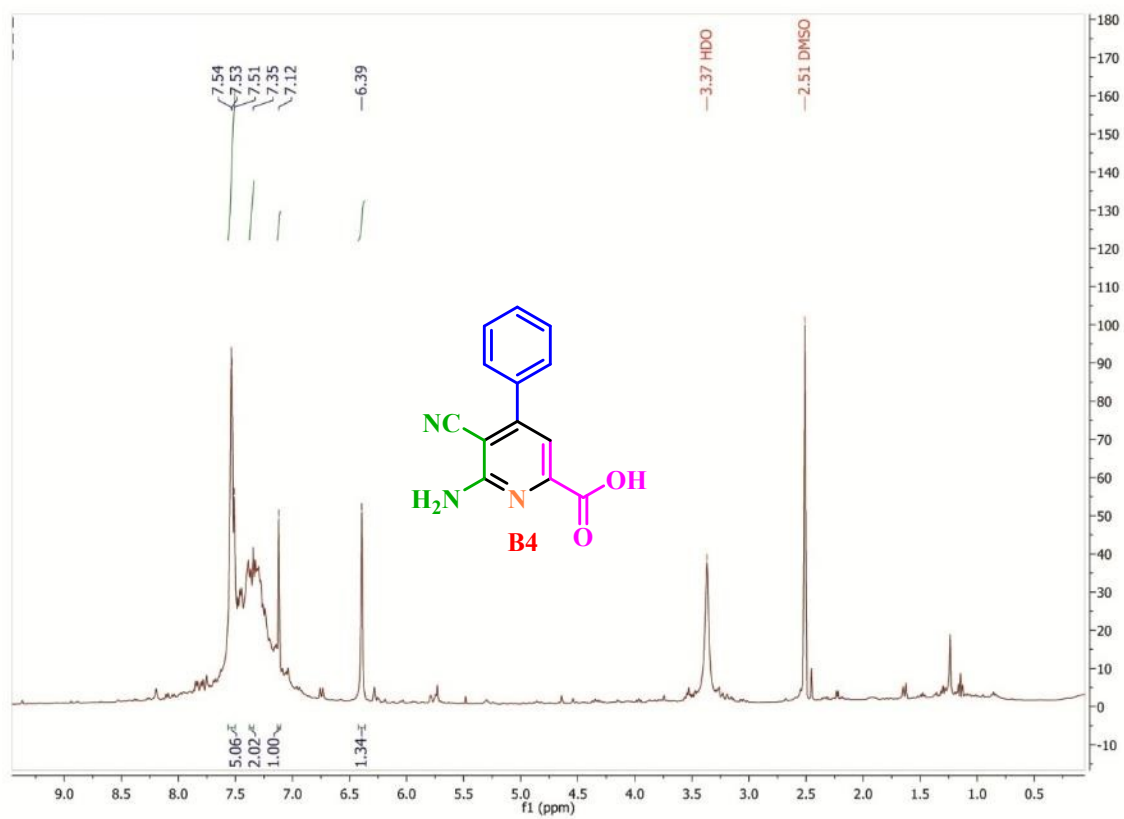

<sup>1</sup>H NMR spectrum of 6-amino-5-cyano-4-phenylpicolinic acid (B4).

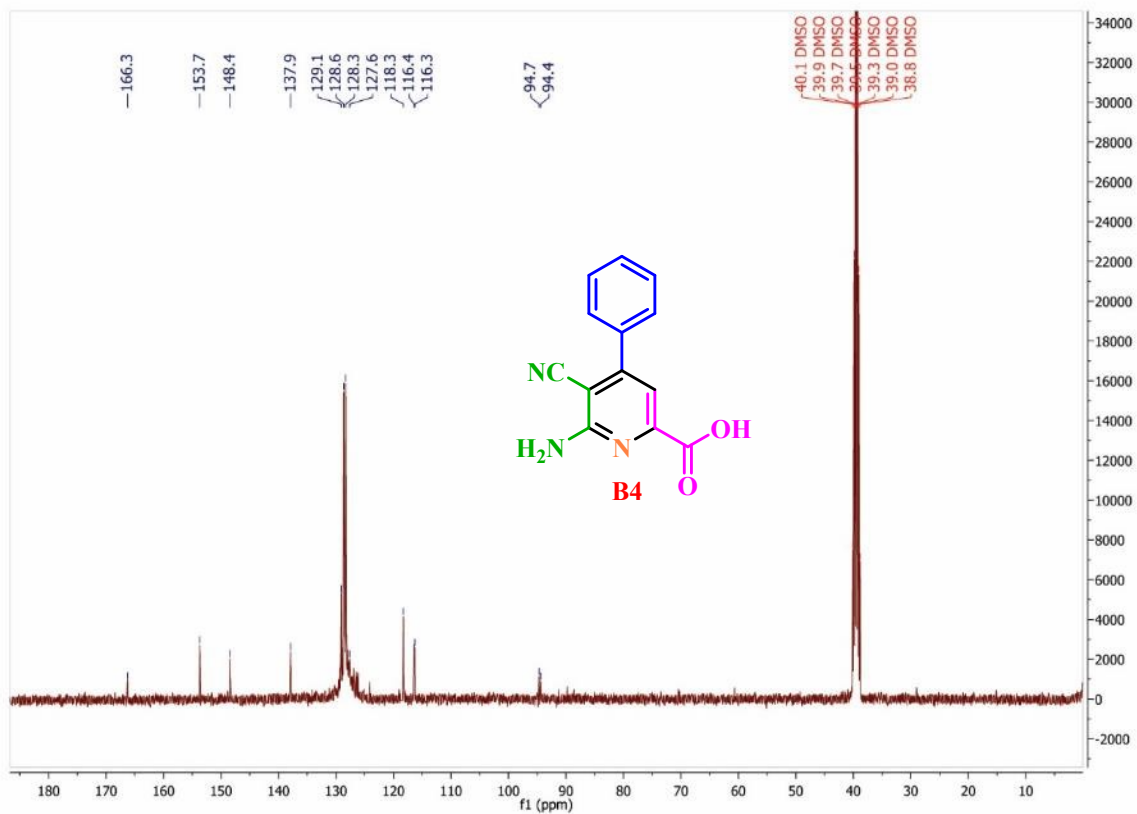

<sup>13</sup>C NMR spectrum of 6-amino-5-cyano-4-phenylpicolinic acid (B4).

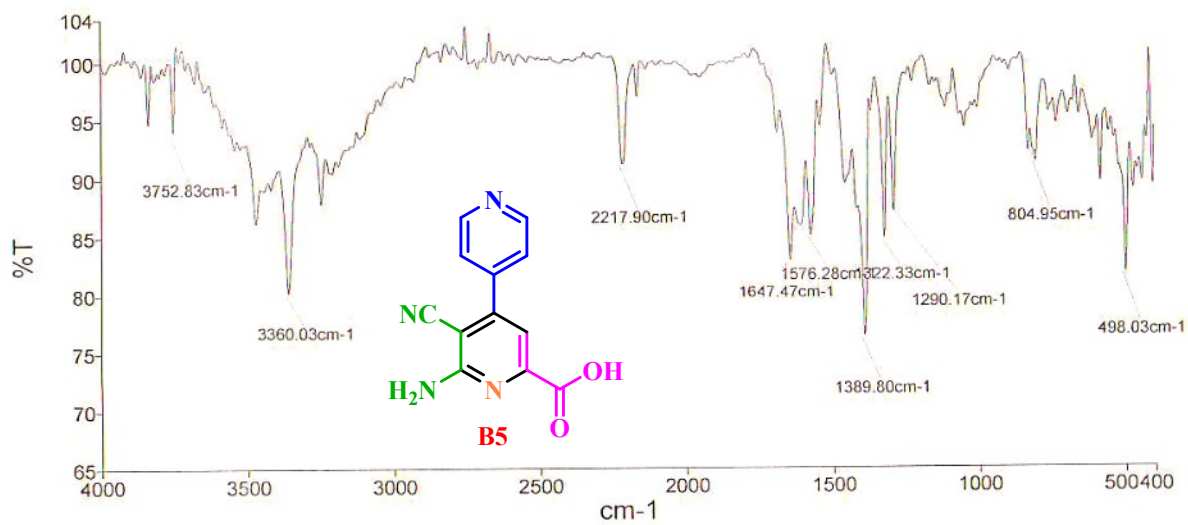

FT-IR spectrum of 6-amino-5-cyano-[4,4'-bipyridine]-2-carboxylic acid (B5).

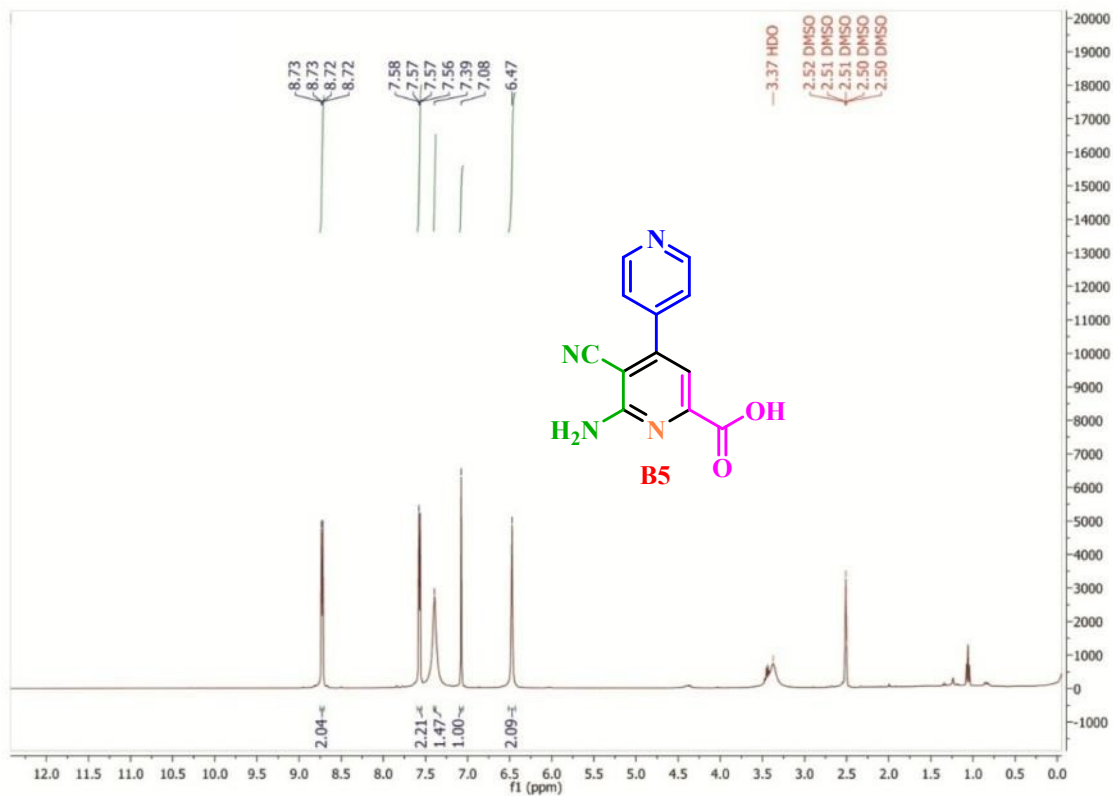

**<sup>1</sup>H NMR spectrum of 6-amino-5-cyano-[4,4'-bipyridine]-2-carboxylic acid (B5).**

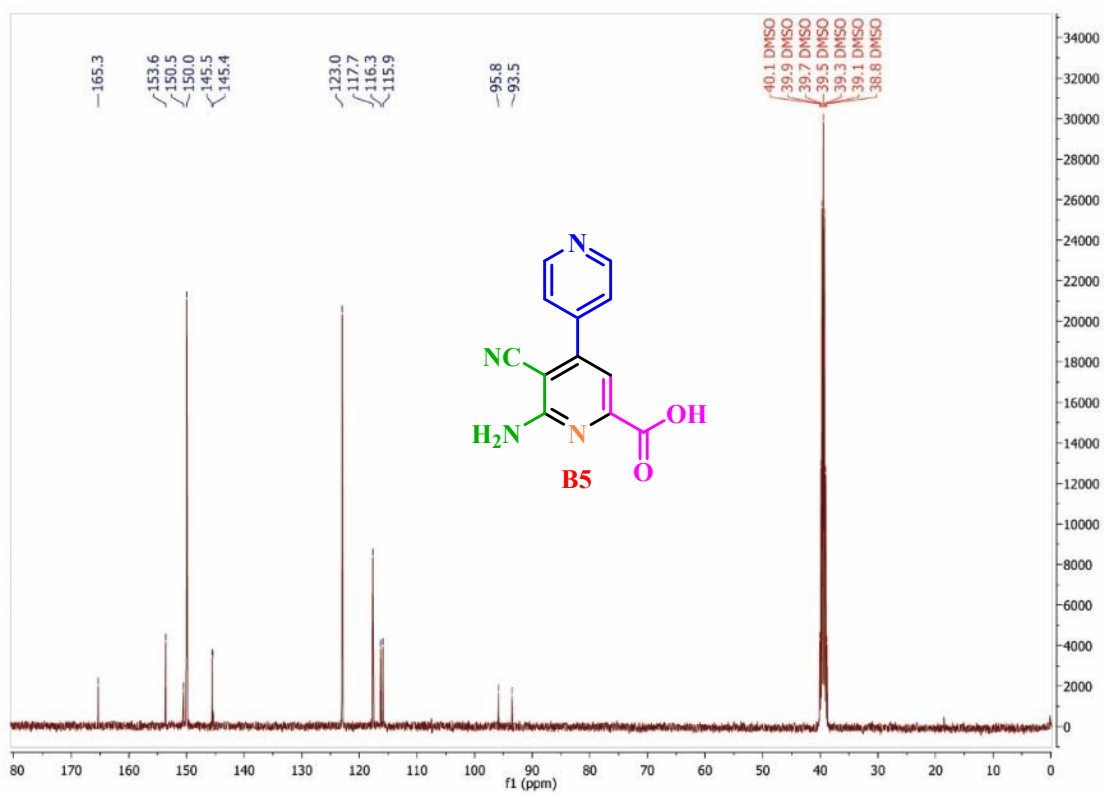

**<sup>13</sup>C NMR spectrum of 6-amino-5-cyano-[4,4'-bipyridine]-2-carboxylic acid (B5).**

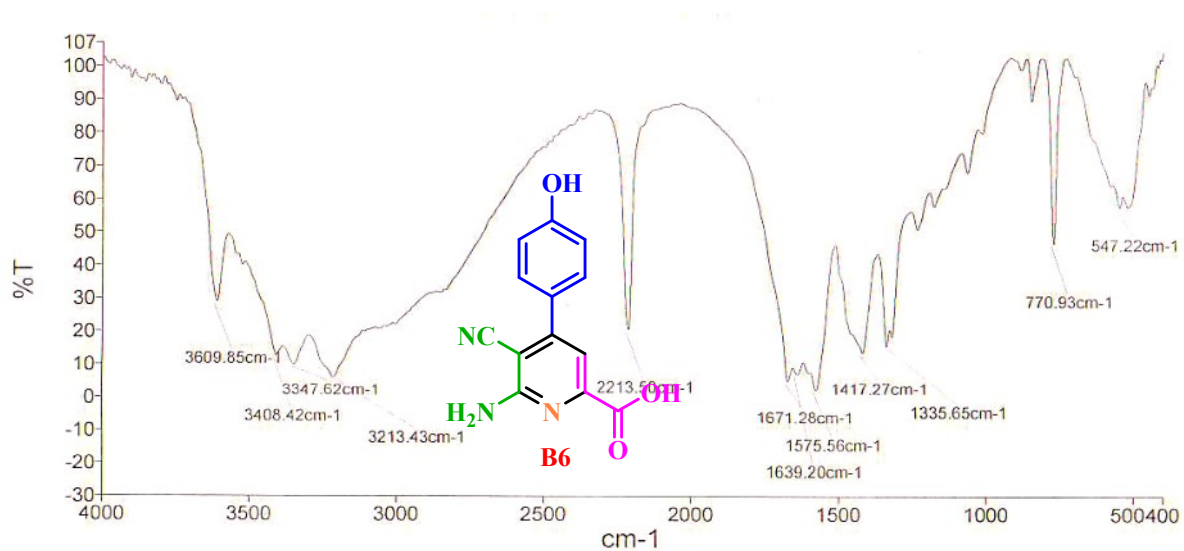

**FT-IR spectrum of 6-amino-5-cyano-4-(4-hydroxyphenyl)picolinic acid (B6).**

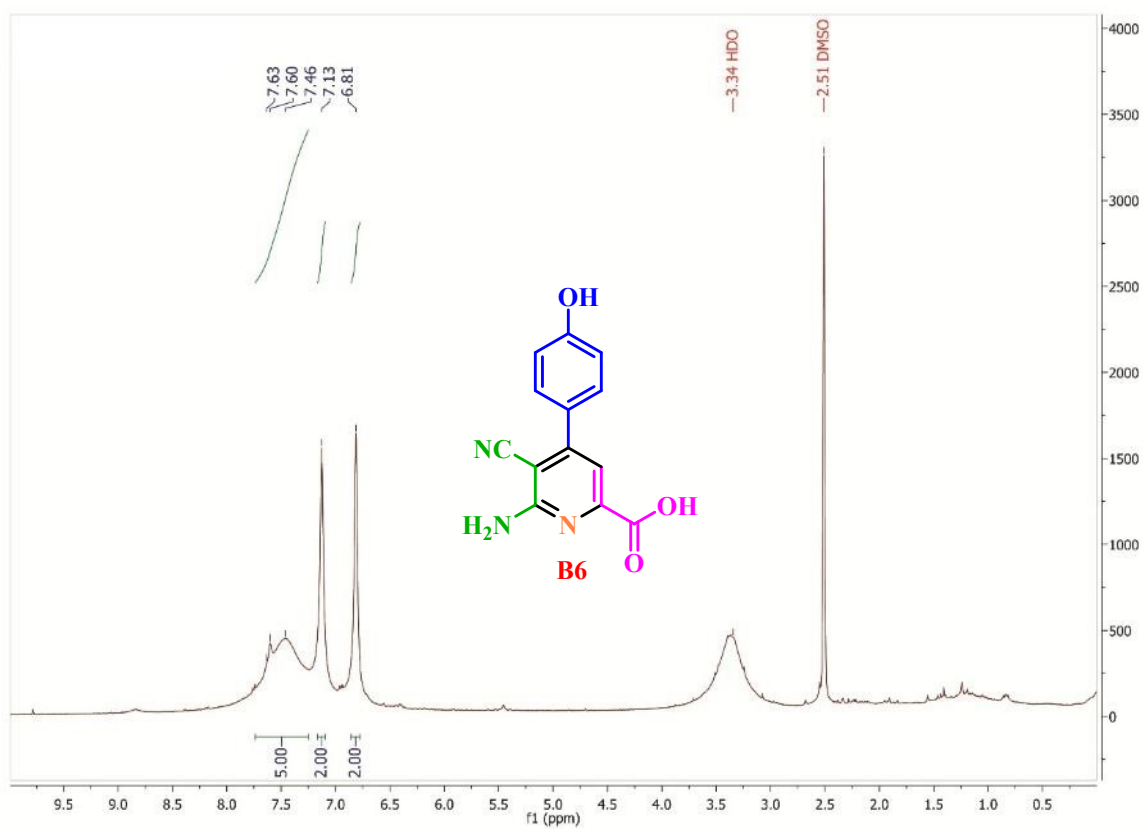

**<sup>1</sup>H NMR spectrum 6-amino-5-cyano-4-(4-hydroxyphenyl)picolinic acid (B6).**



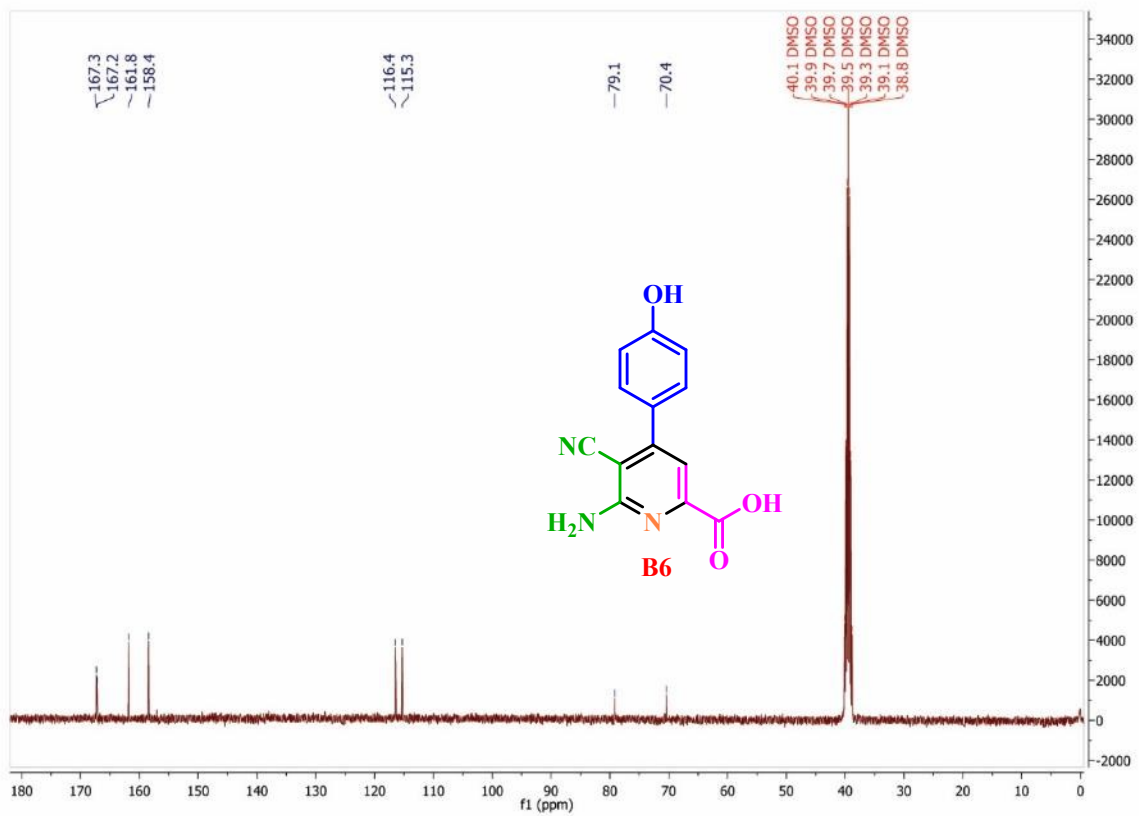

<sup>13</sup>C NMR spectrum 6-amino-5-cyano-4-(4-hydroxyphenyl)picolinic acid (B6).
